# Supplementary material
Source: PubMed Central journal article supplement (PMC3529029)

S4a

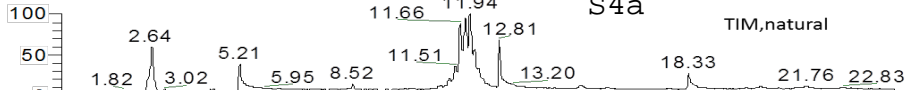

NL: 2.74E8  
 TIC F: MS  
 tc\_281011\_natcomp1\_20  
 ul

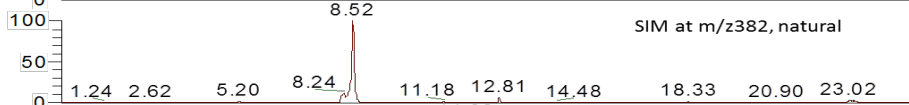

NL: 8.45E6  
 m/z= 381.50-382.50 F:  
 MS  
 tc\_281011\_natcomp1\_20  
 ul

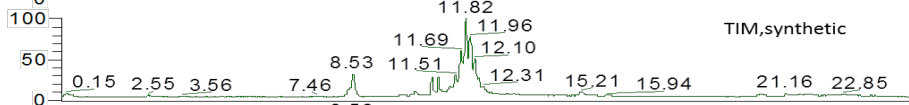

NL: 3.37E8  
 TIC F: MS  
 tc\_281011\_syntheticcom  
 p1\_125ng\_ul\_5ul

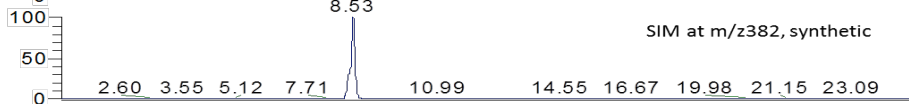

NL: 5.07E7  
 m/z= 381.50-382.50 F:  
 MS  
 tc\_281011\_syntheticcom  
 p1\_125ng\_ul\_5ul

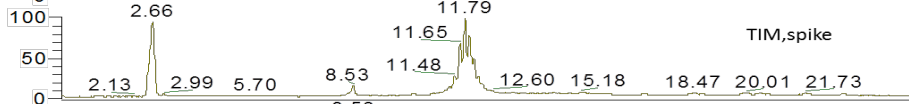

NL: 3.31E8  
 TIC F: MS  
 tc\_281011\_spikenat&synt  
 heticcomp1

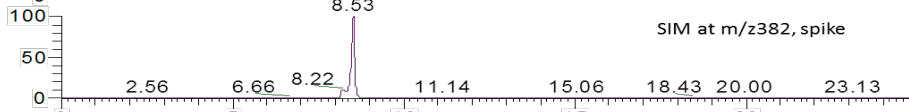

NL: 2.13E7  
 m/z= 381.50-382.50 F:  
 MS  
 tc\_281011\_spikenat&synt  
 heticcomp1

S4b

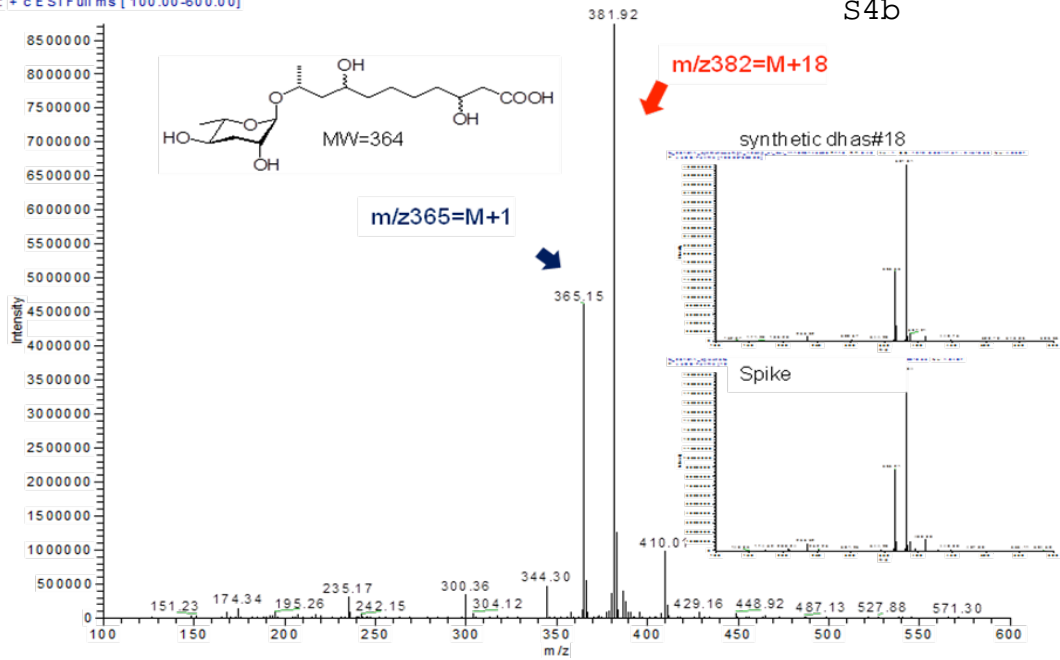

S4c

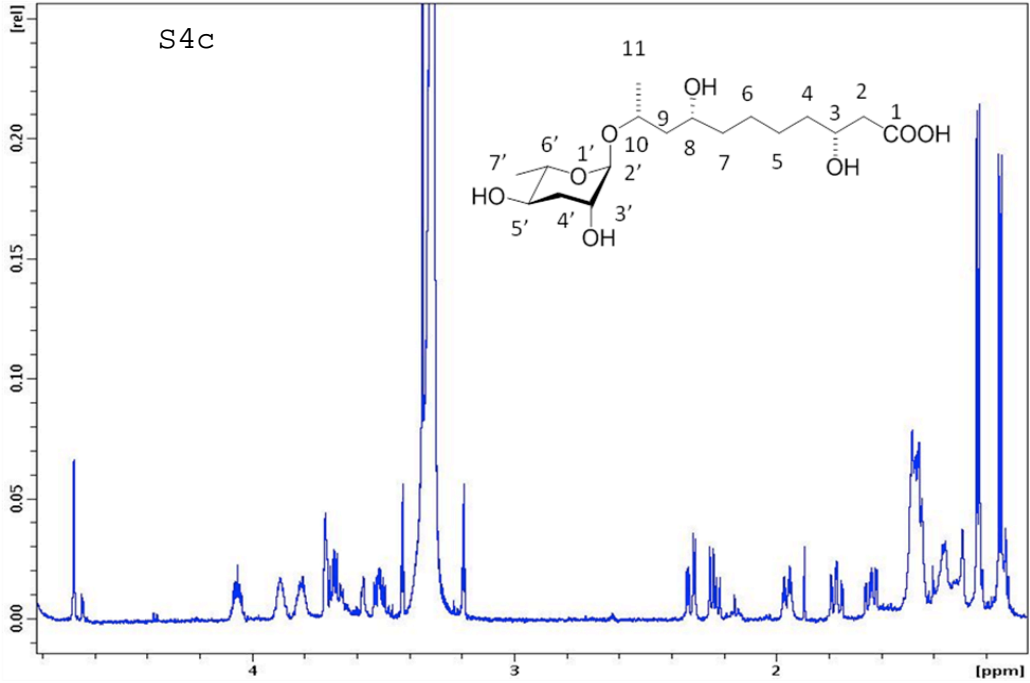

S4d

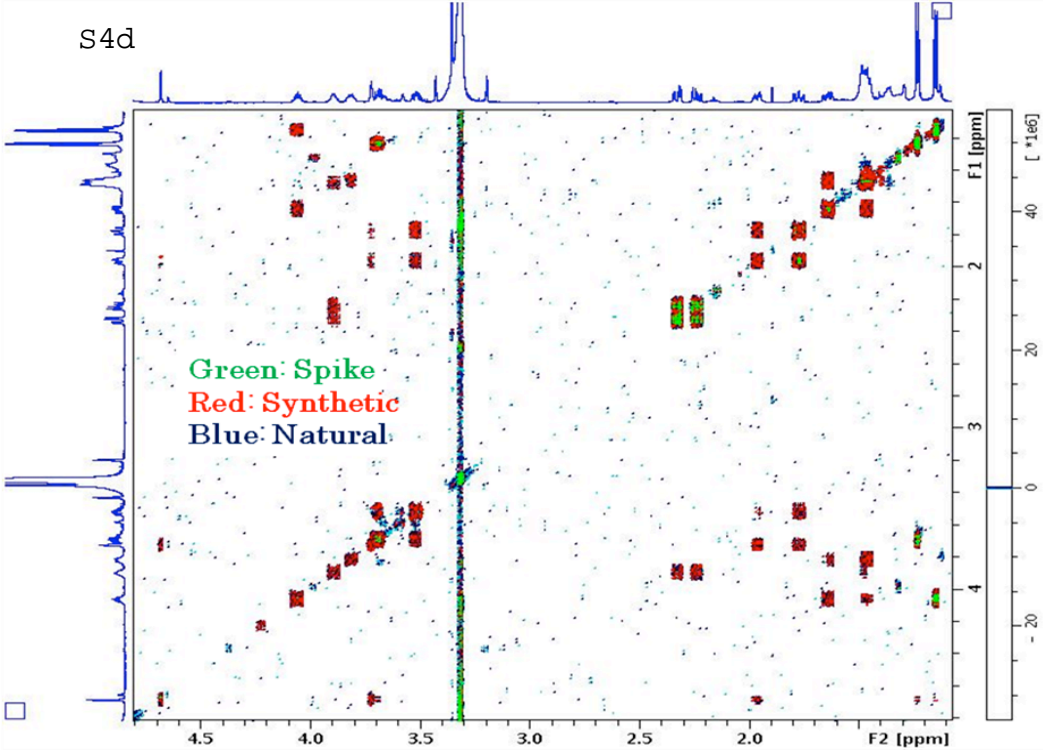

S4e

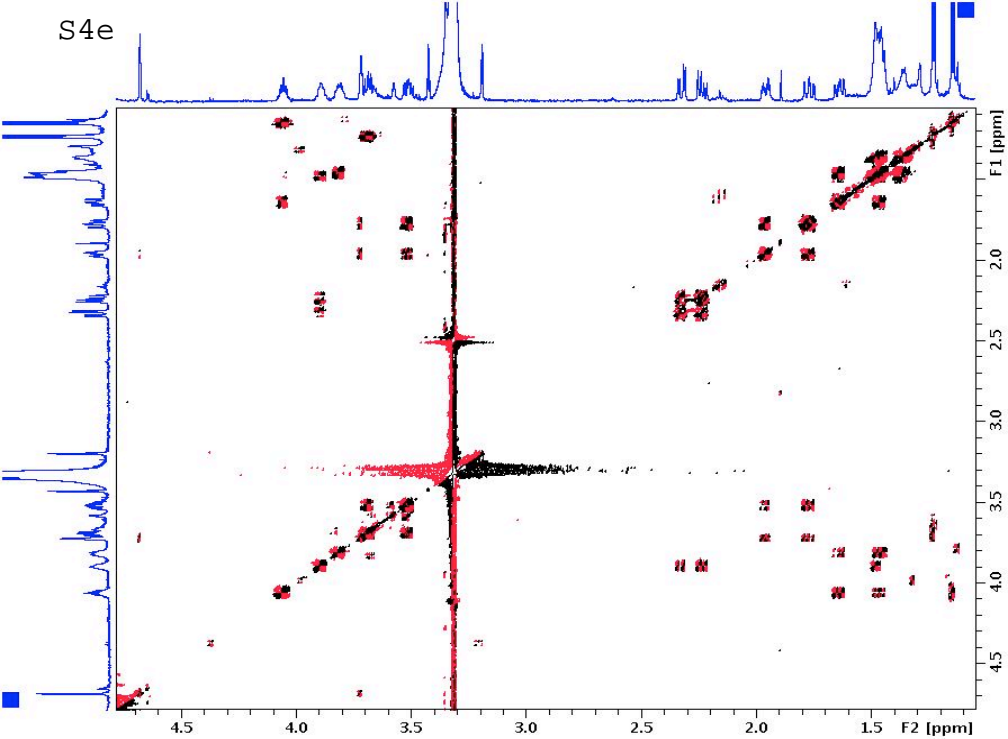

S4f

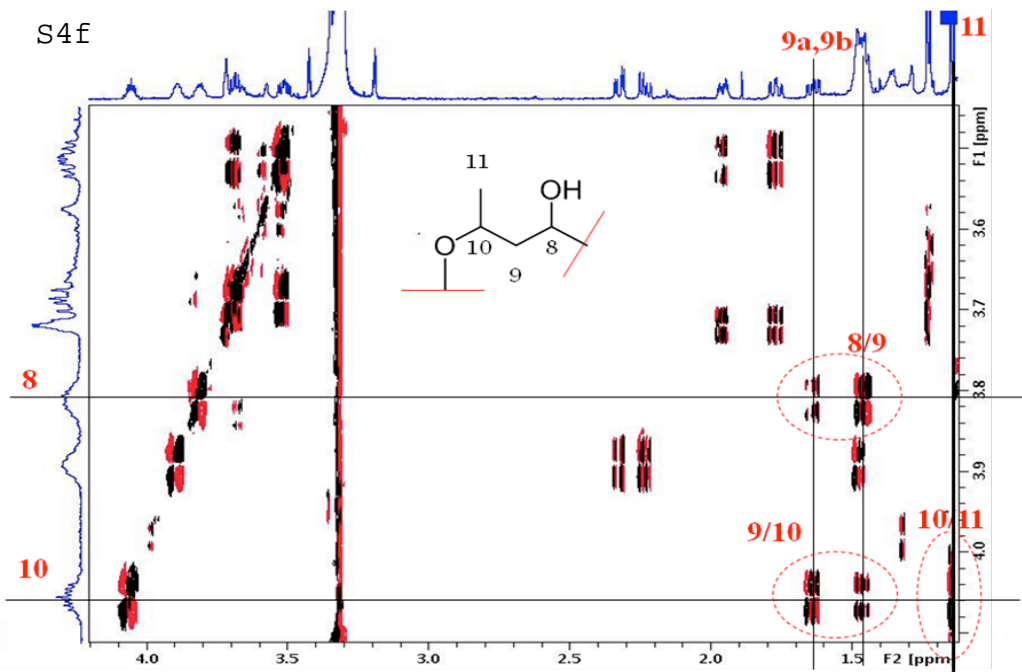

S4g

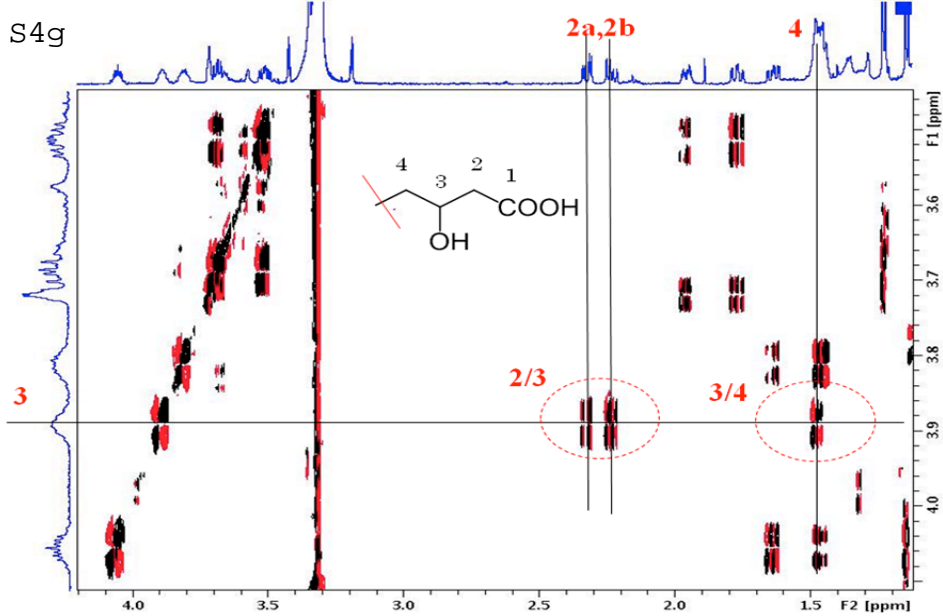

S4h

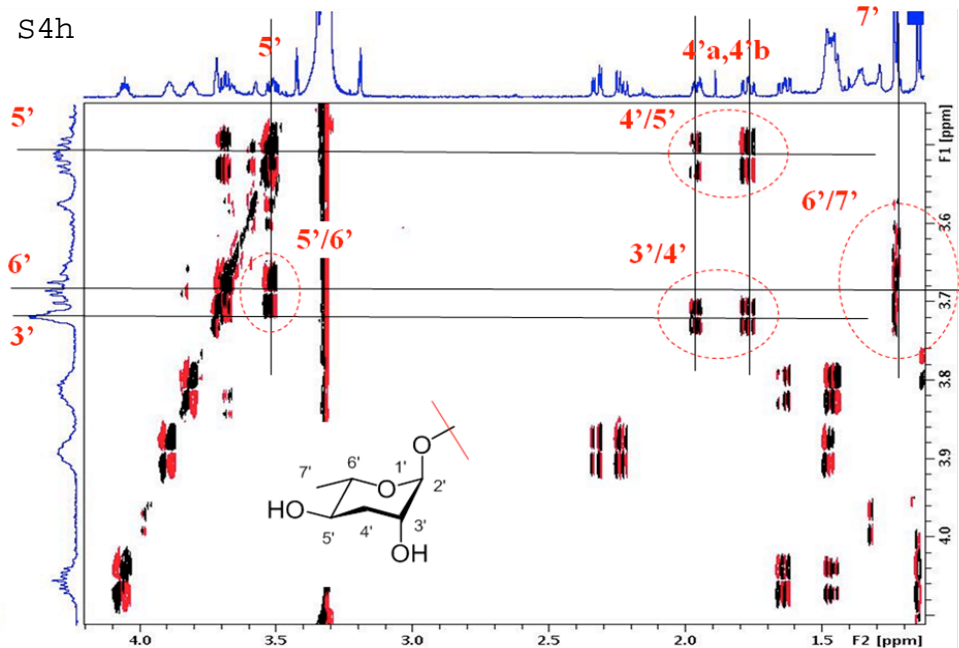



S4i

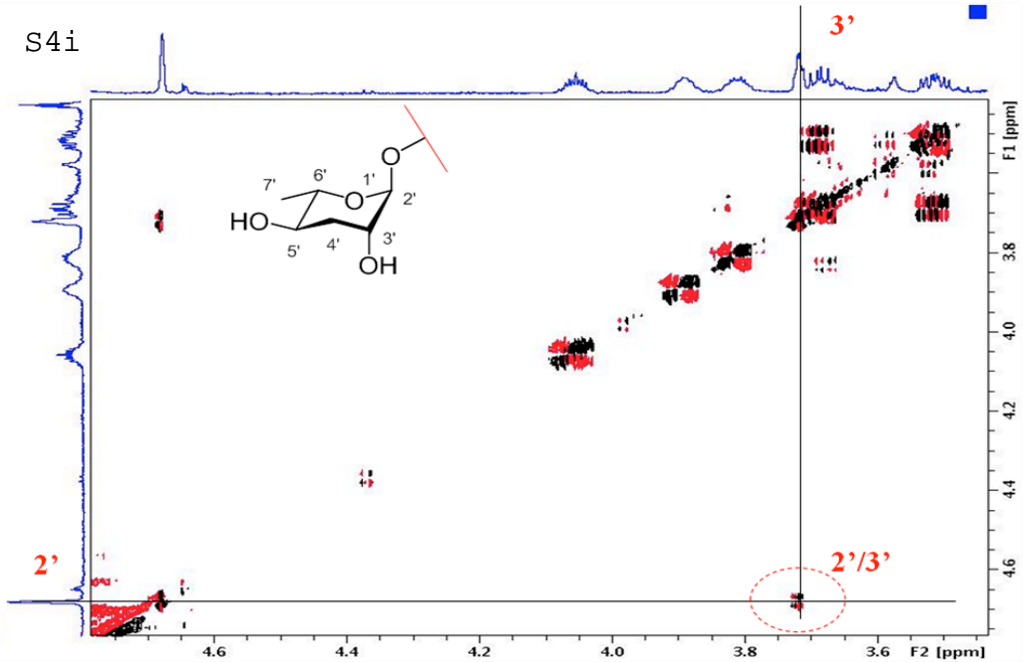

Supplement: 1218302109_sfig04.pdf [file 1218302109_sfig04.pdf]
