# Supplementary material
Source: PubMed Central journal article supplement (PMC3529029)

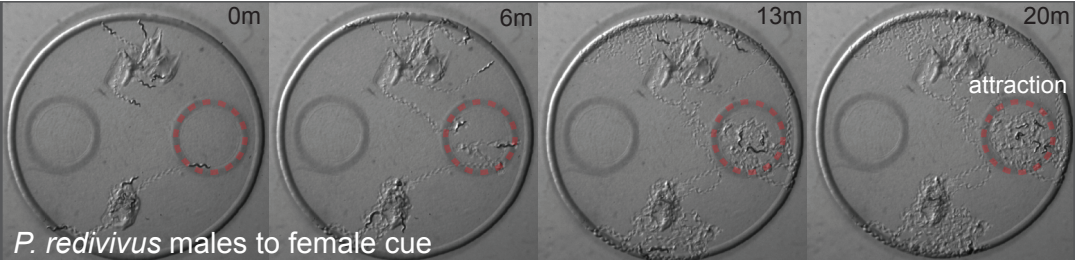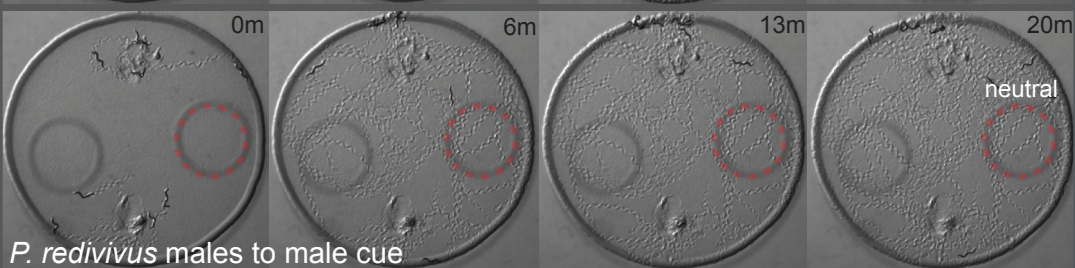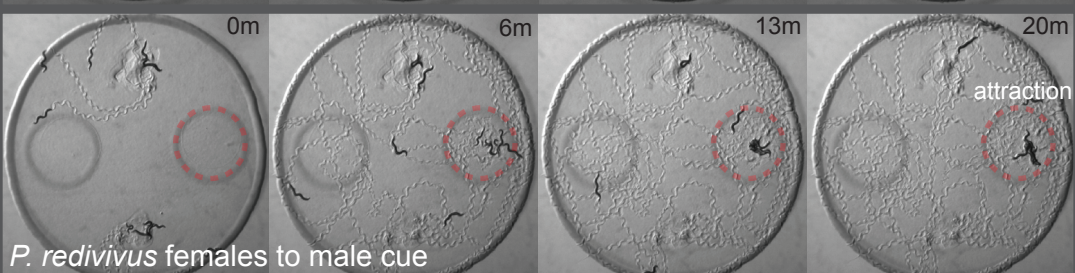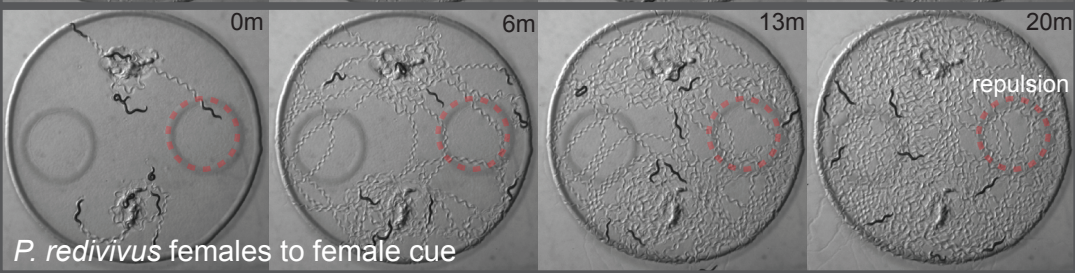

Supplement: 1218302109_sfig01.pdf [file 1218302109_sfig01.pdf]

# Activity Guided Fractionation

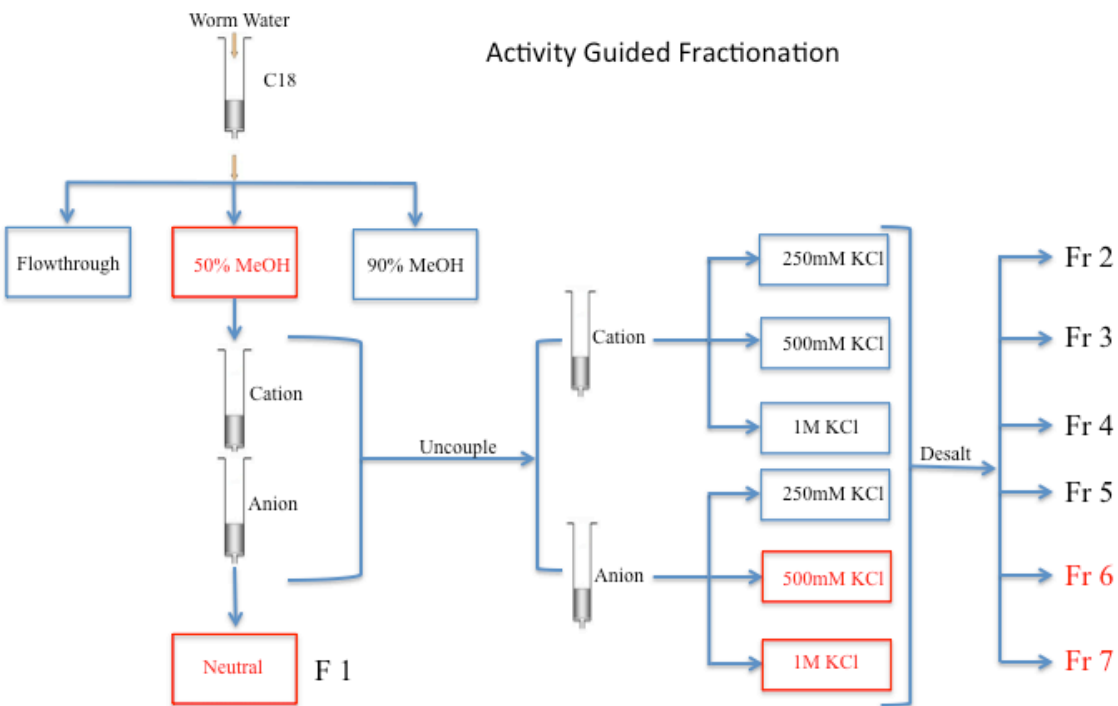

Active Fraction

Supplement: 1218302109_sfig02.pdf [file 1218302109_sfig02.pdf]

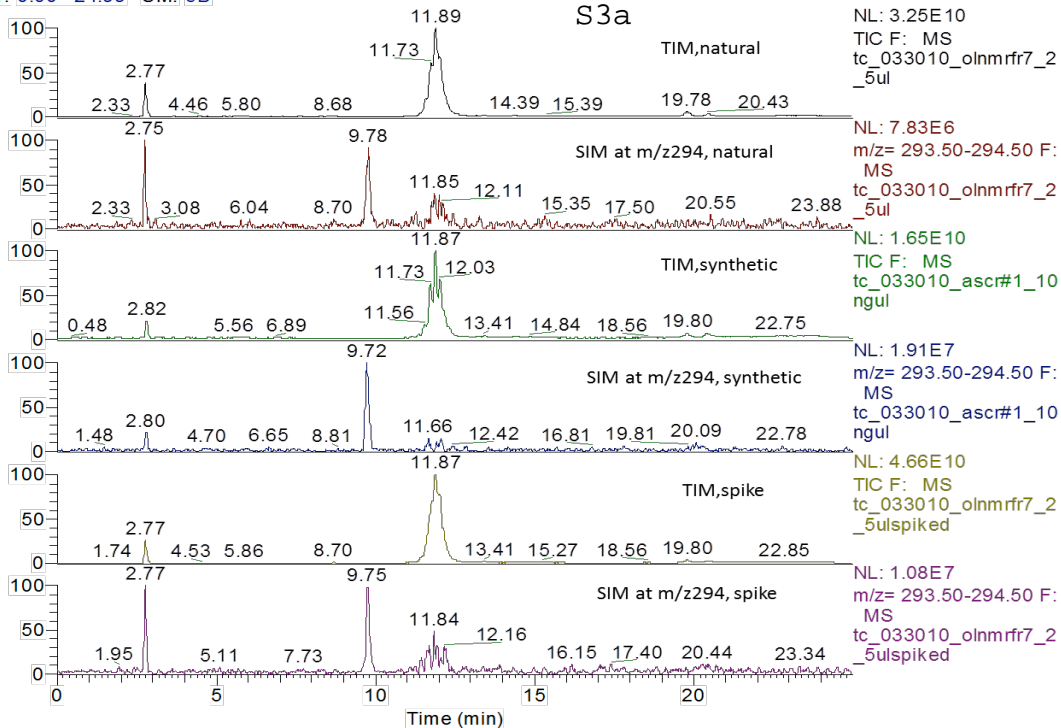

S3b

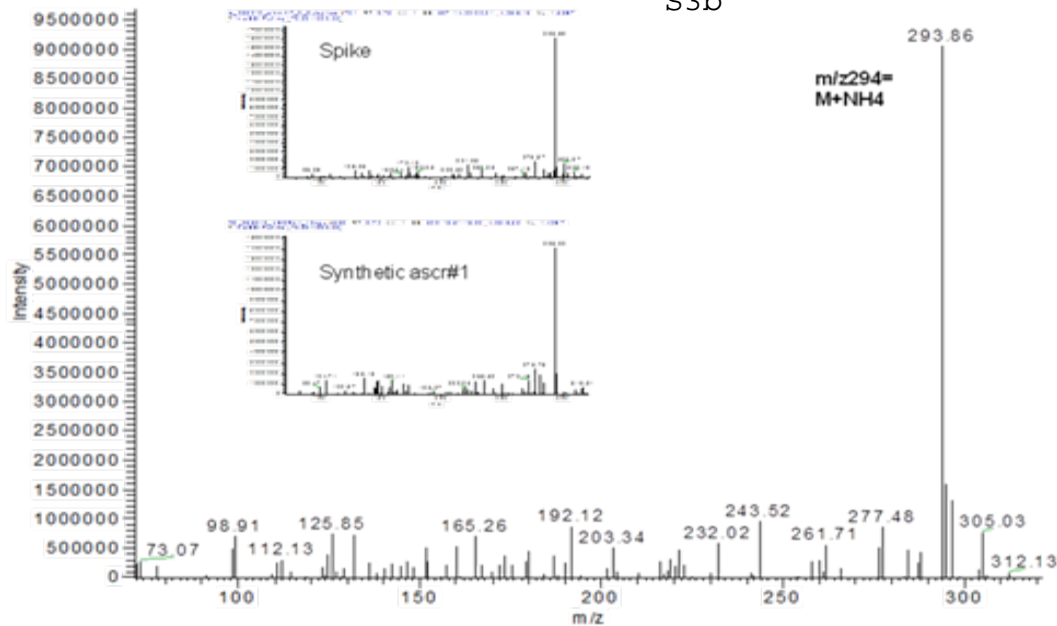

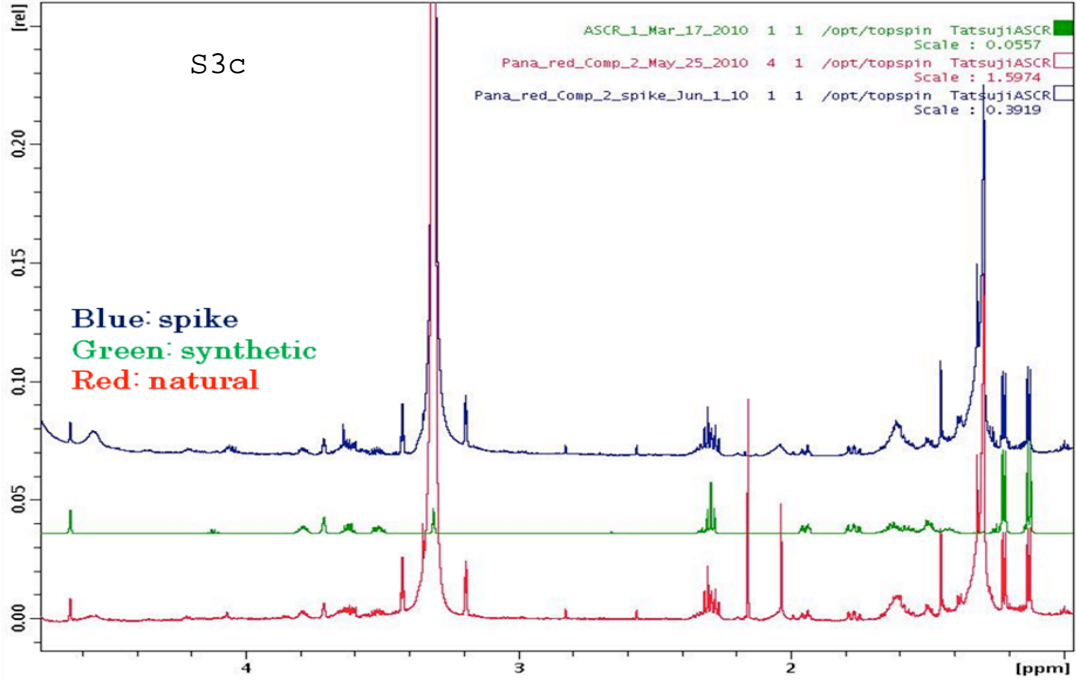

Supplement: 1218302109_sfig03.pdf [file 1218302109_sfig03.pdf]

S5a

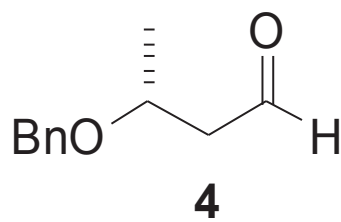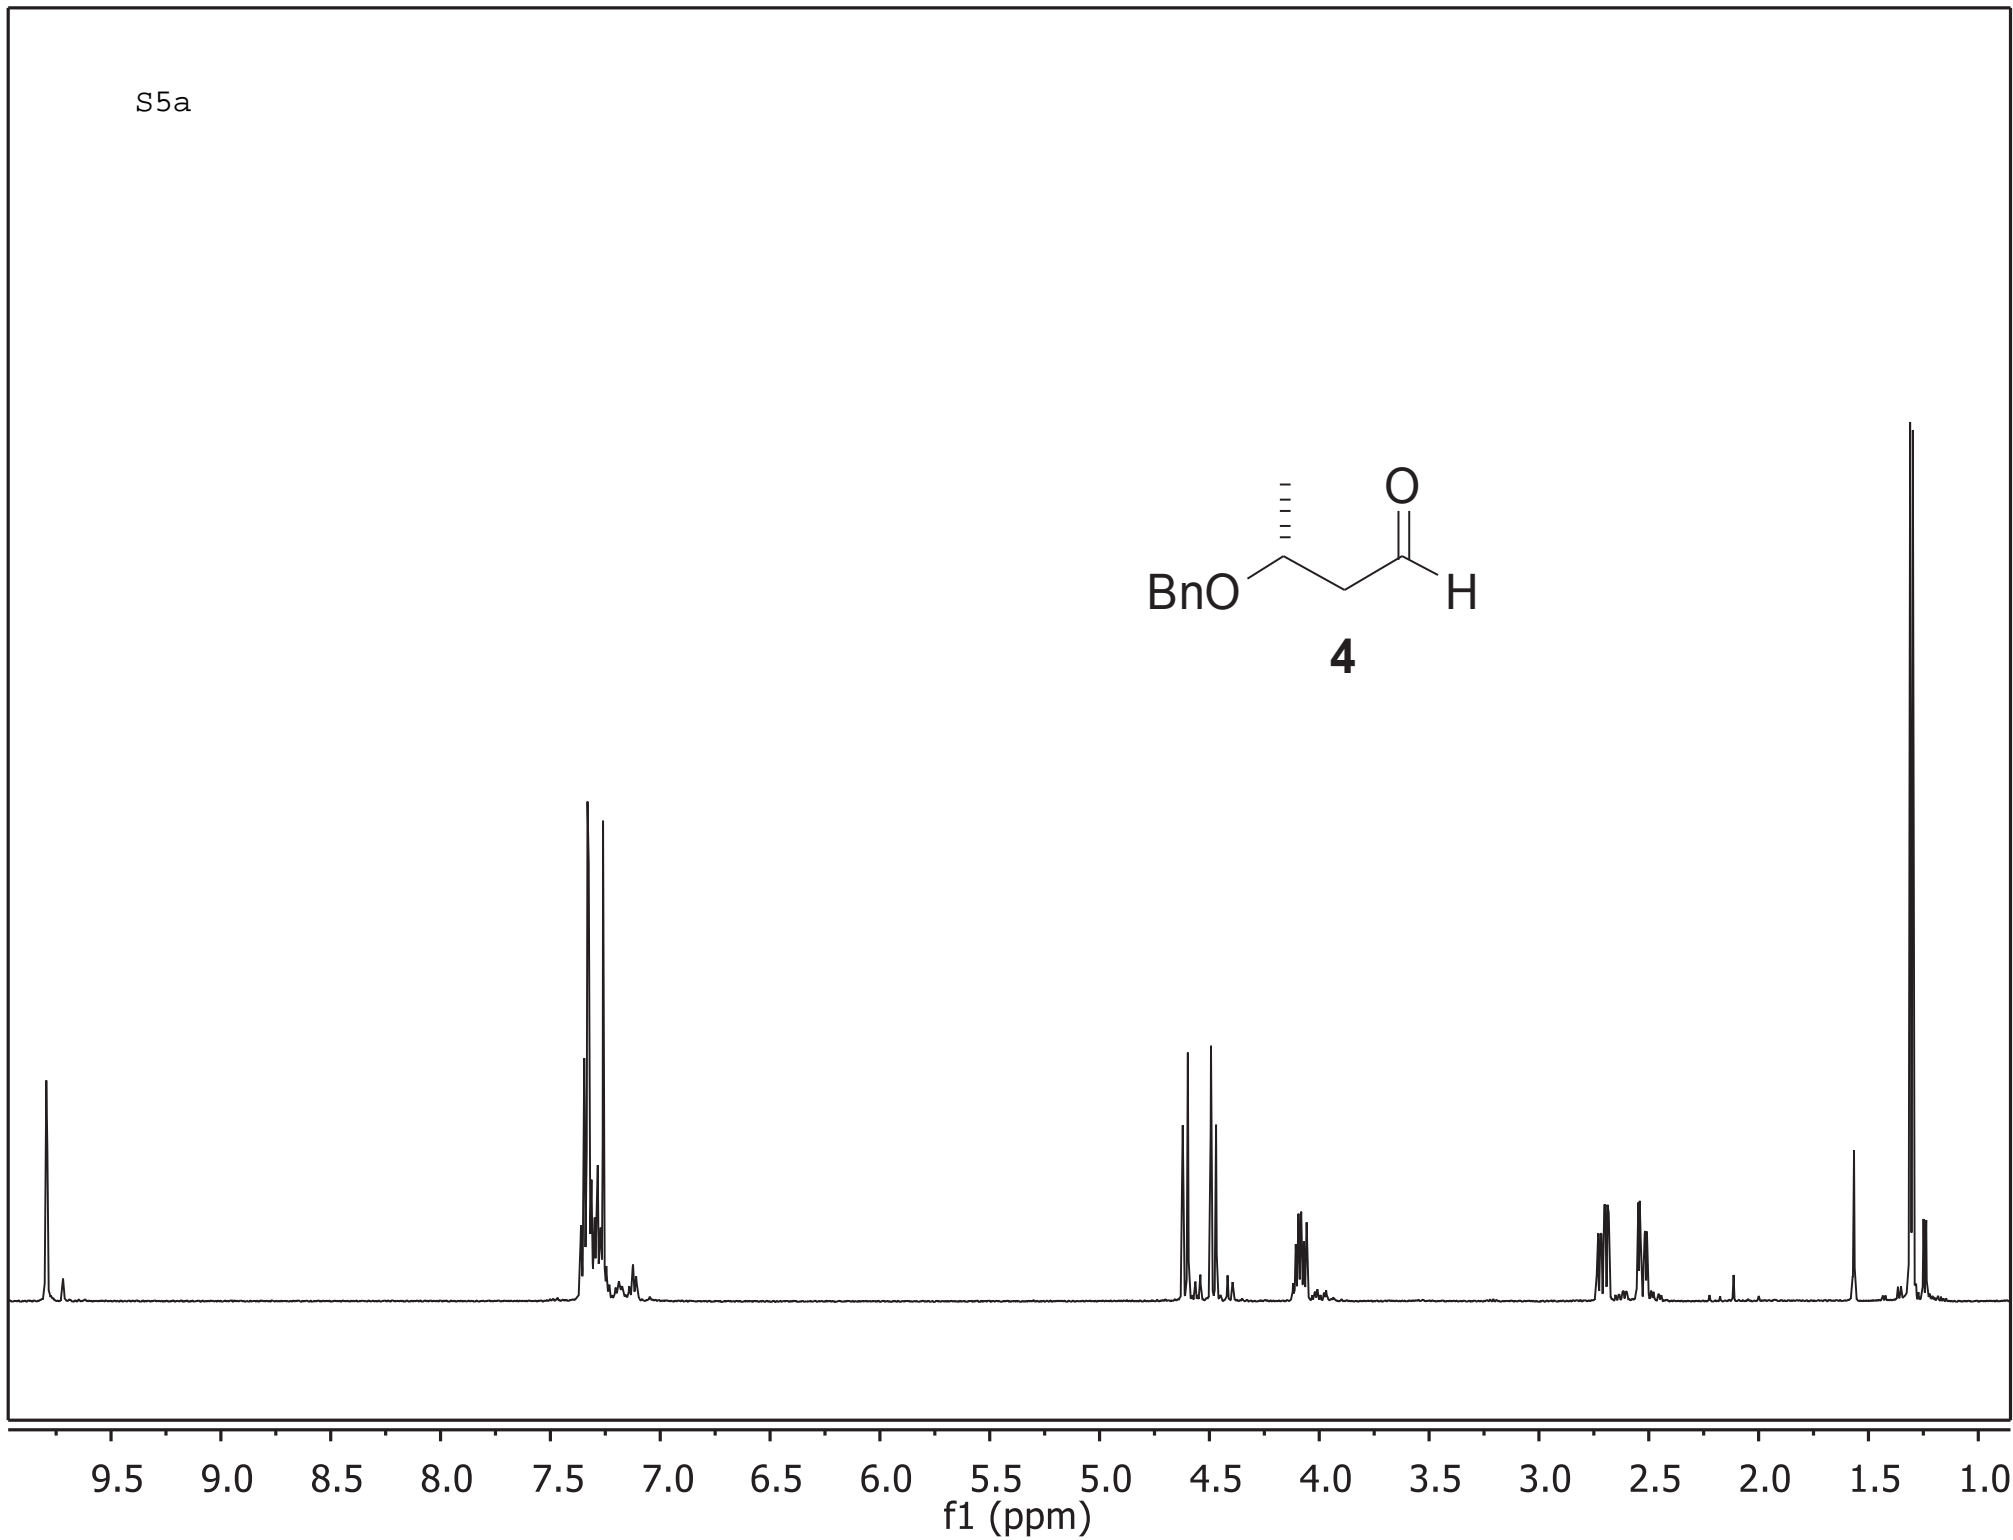

S5b

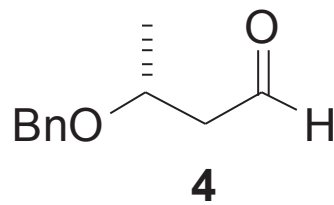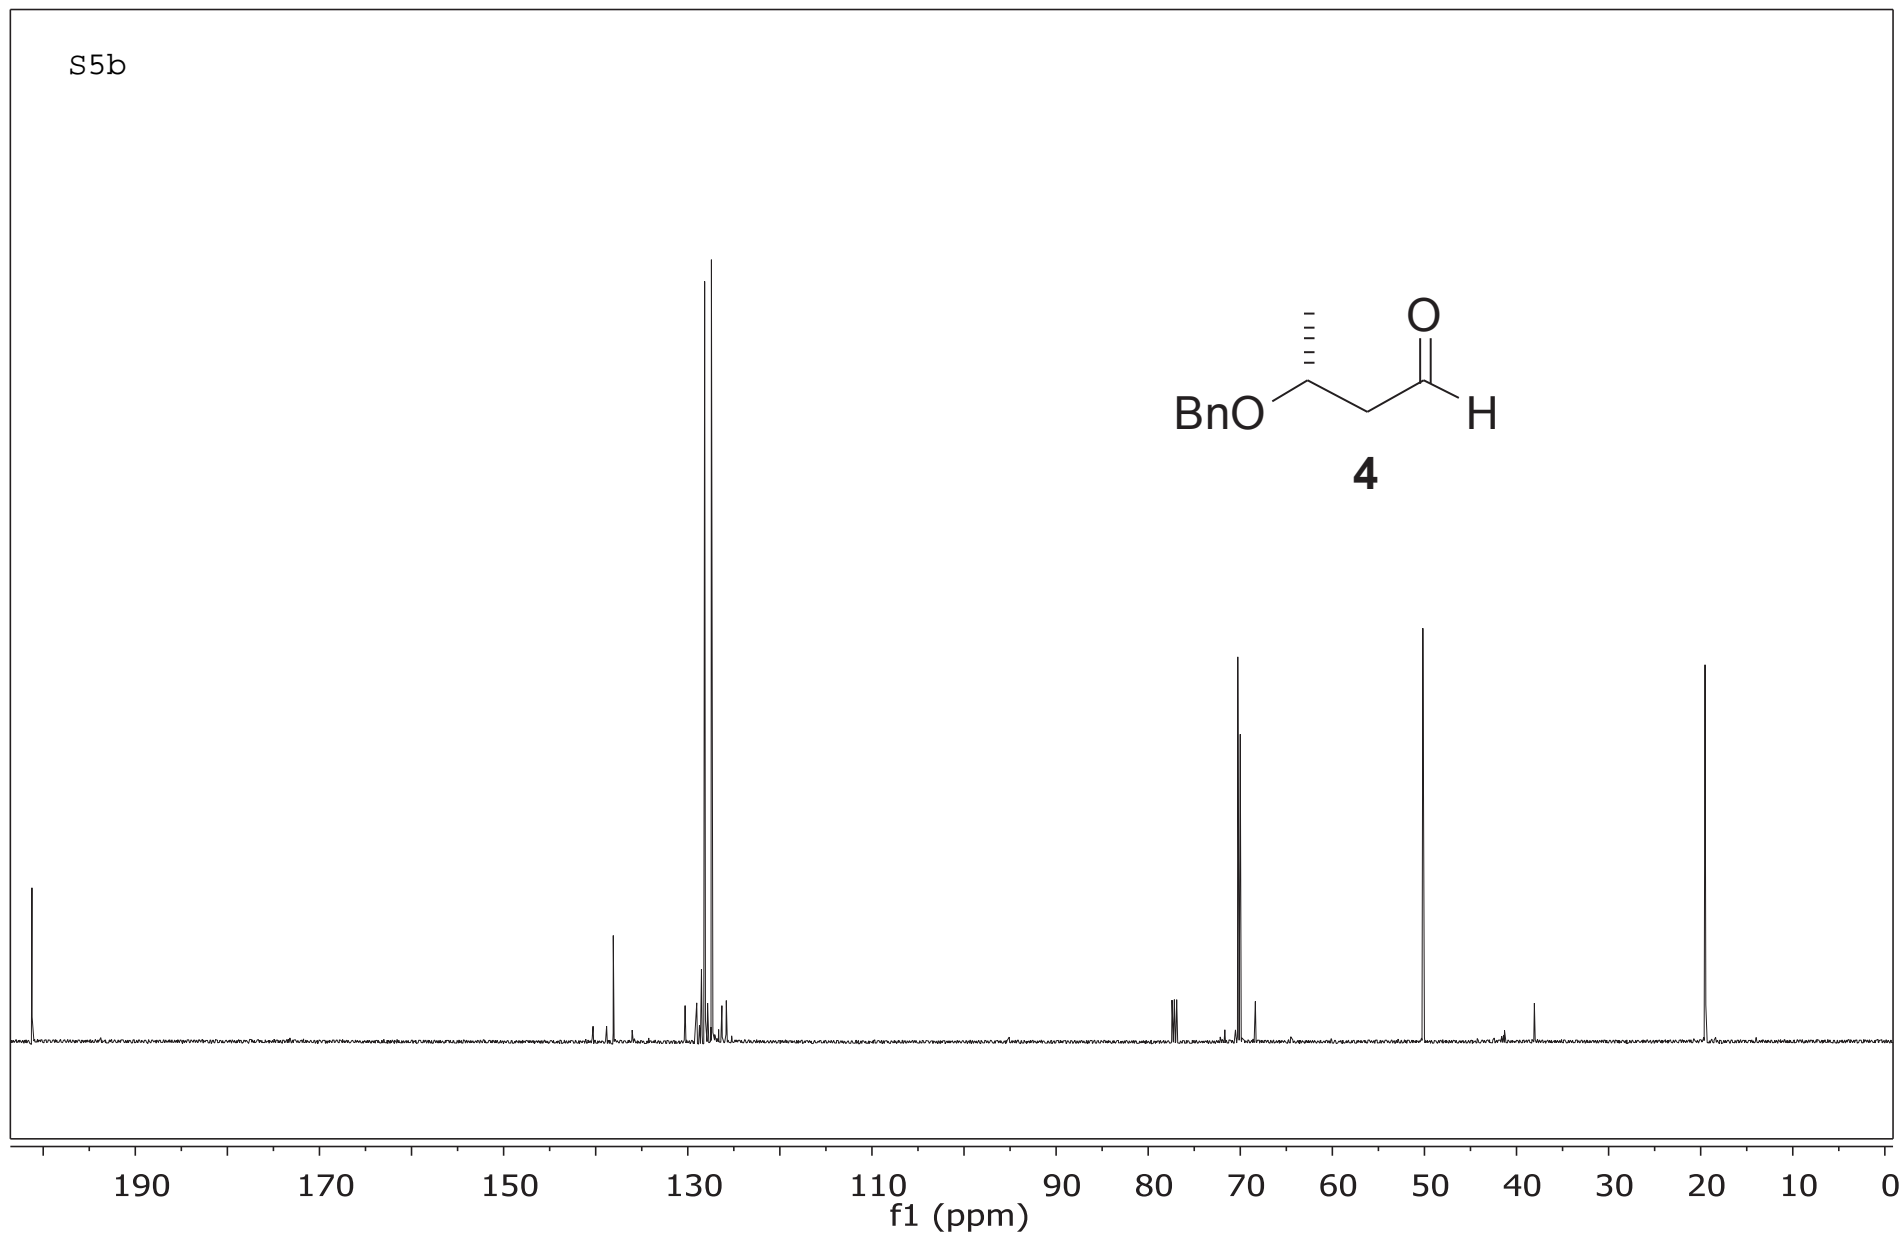

S5c

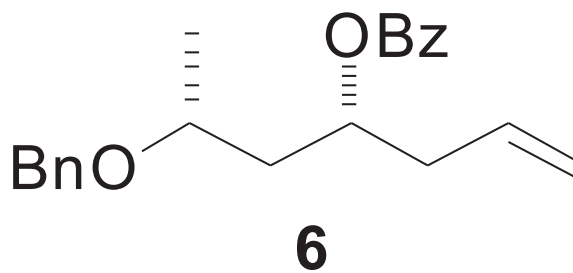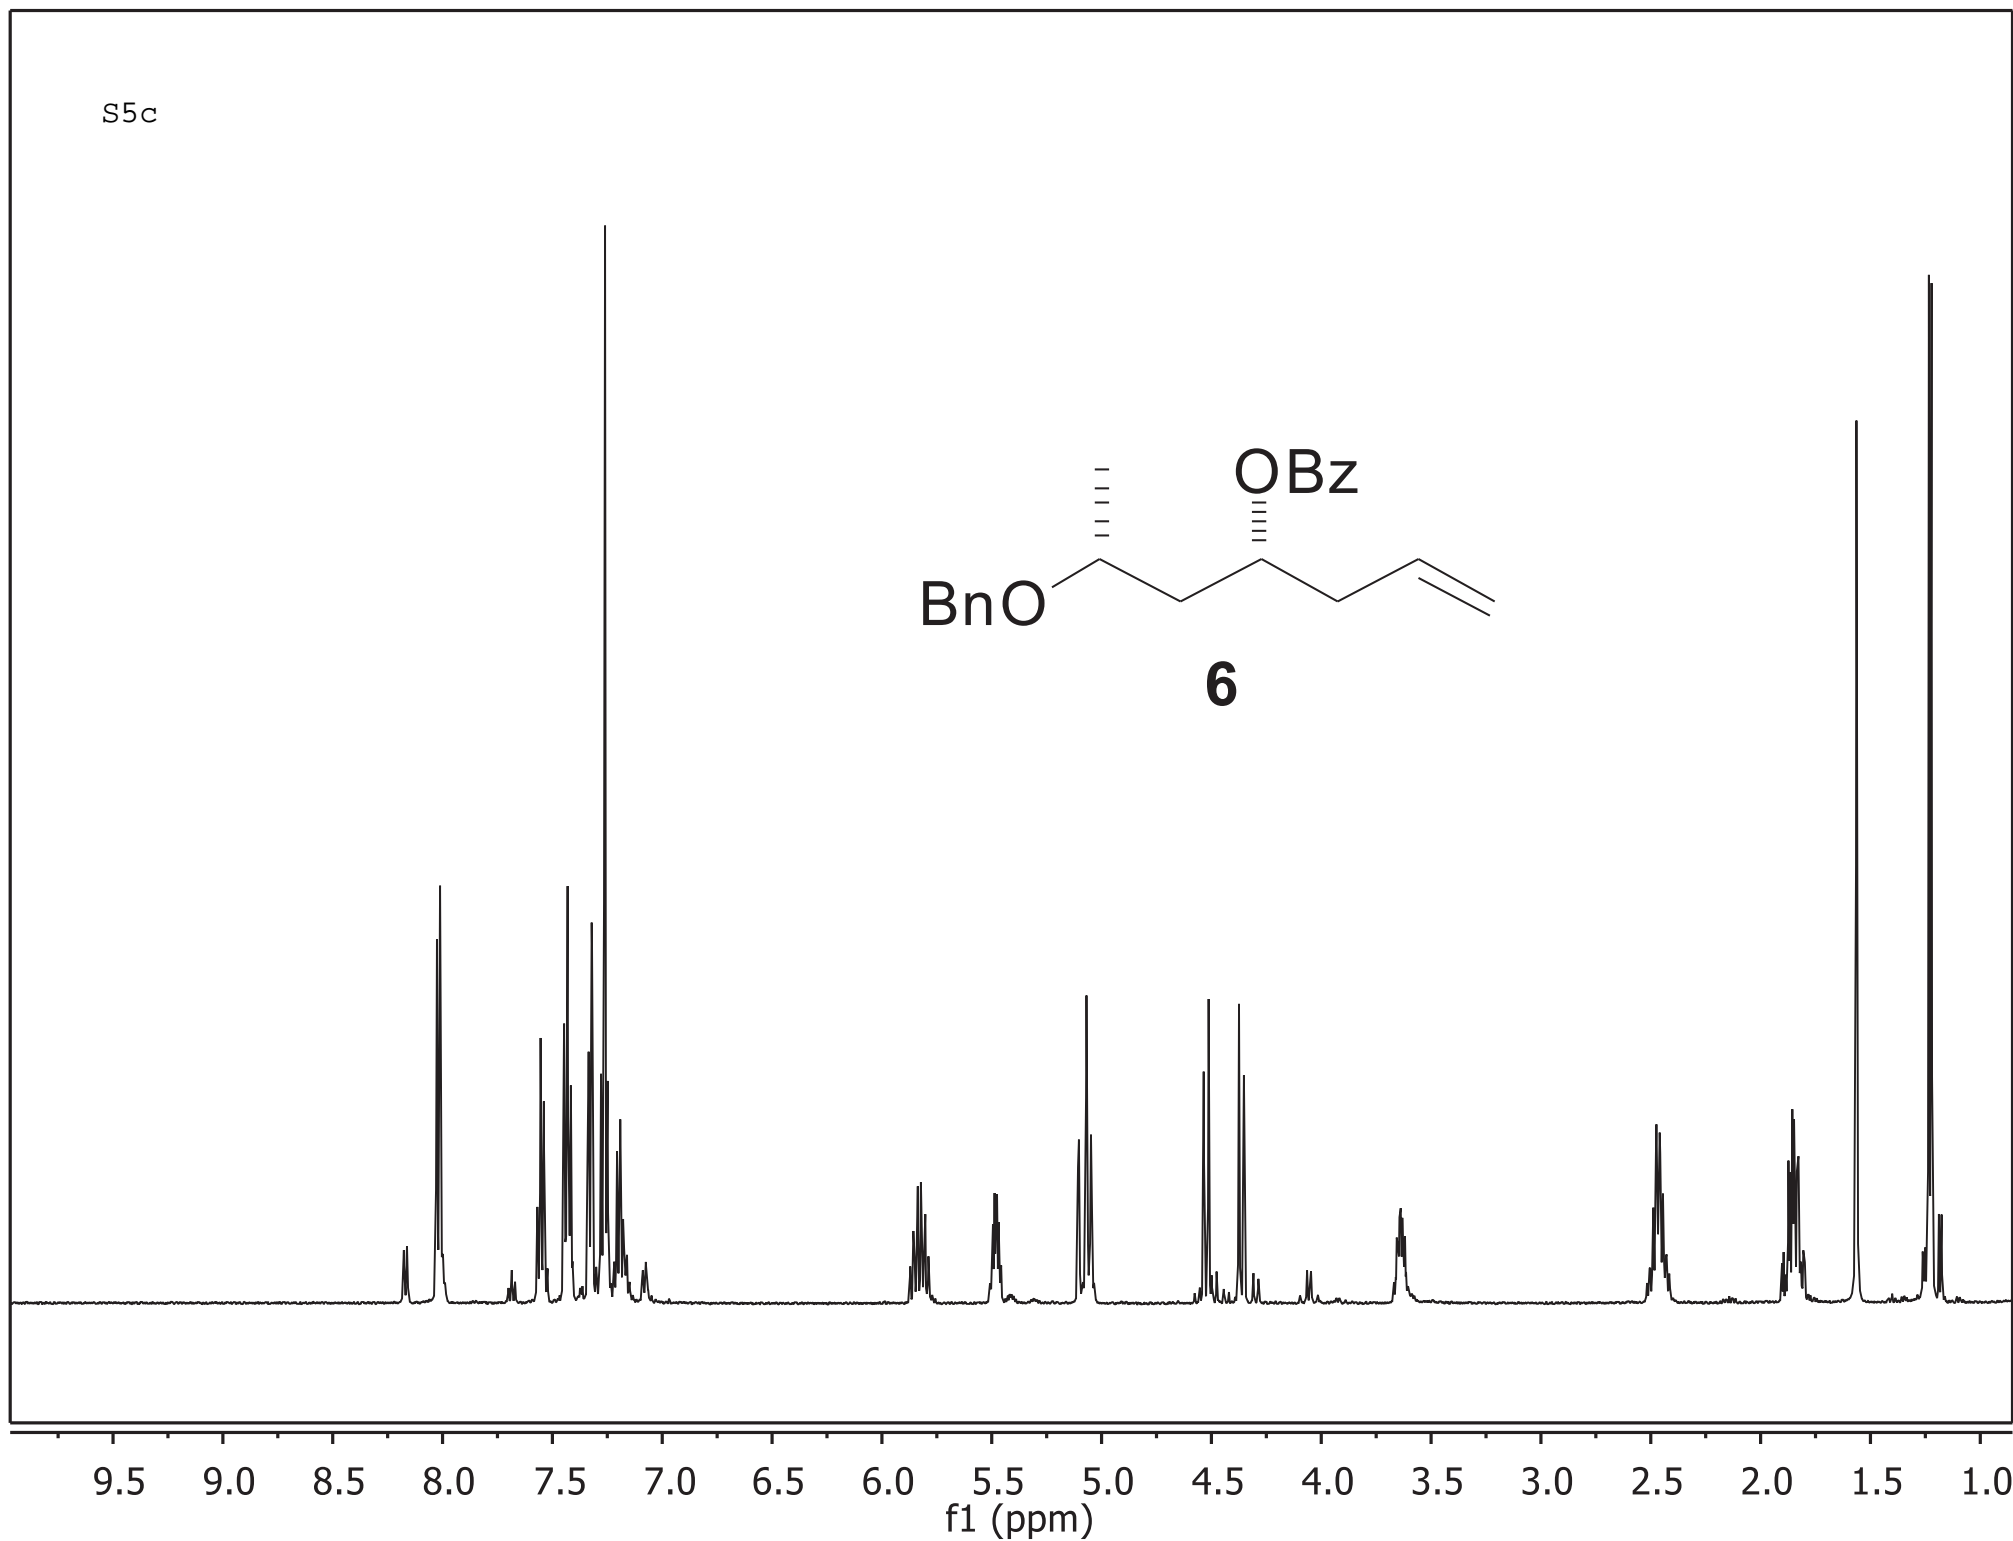

s5d

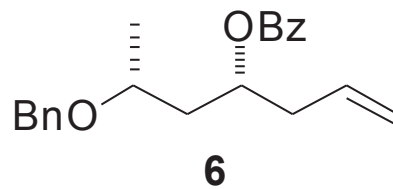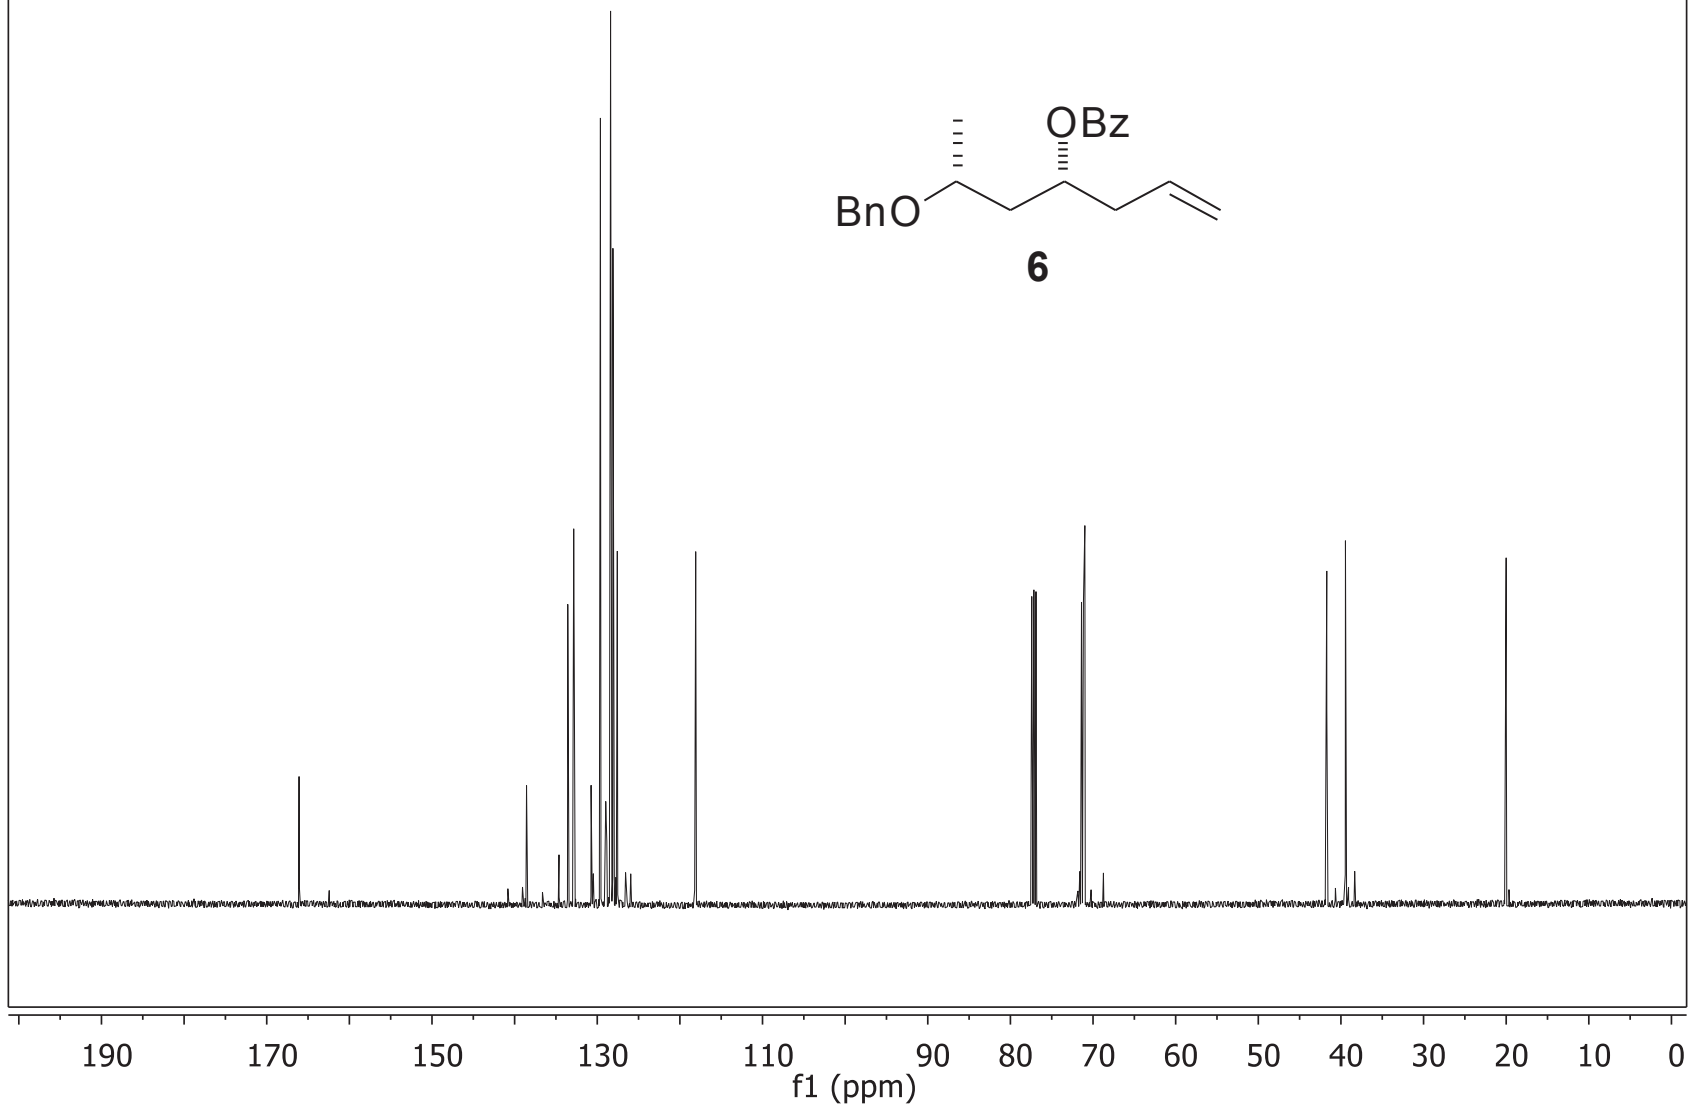

S5e

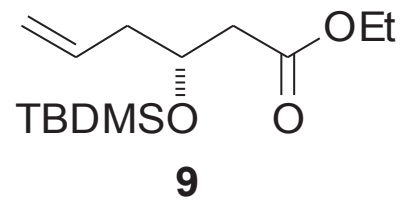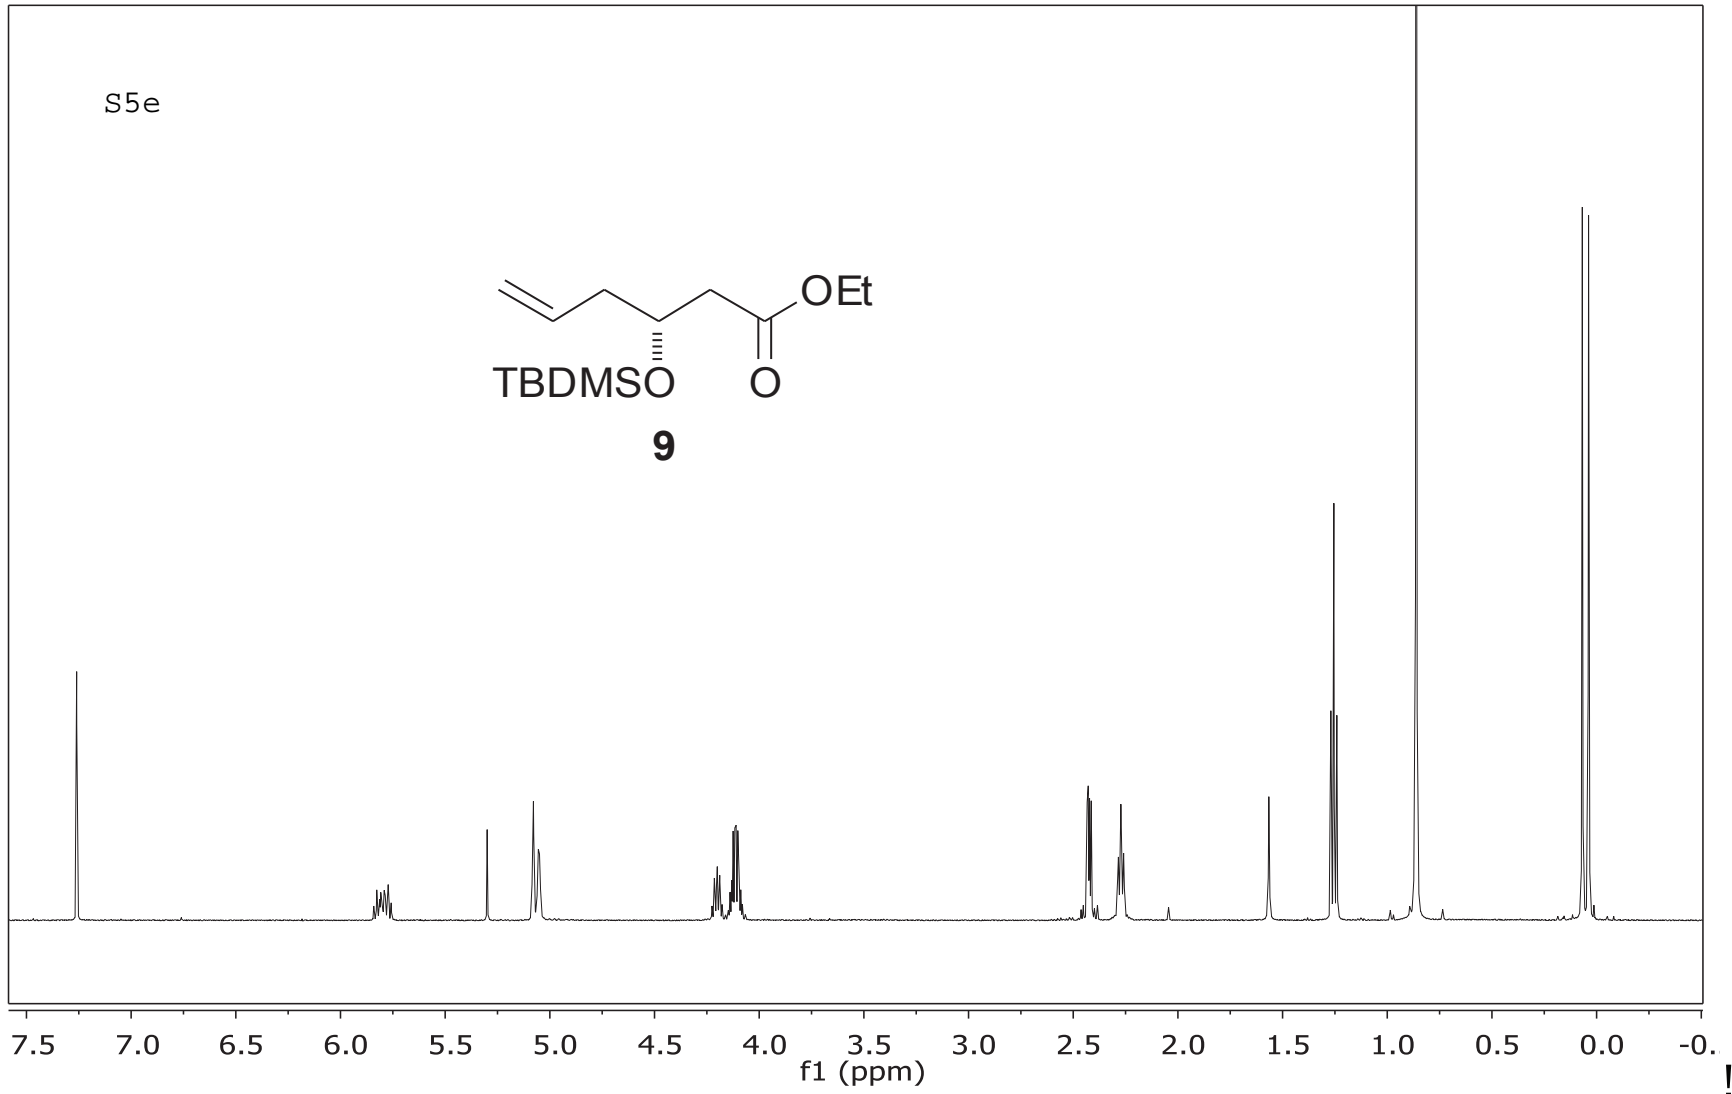

S5f

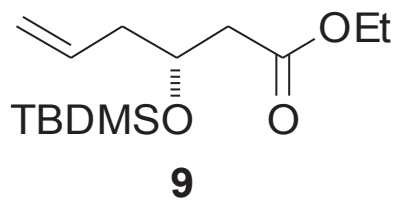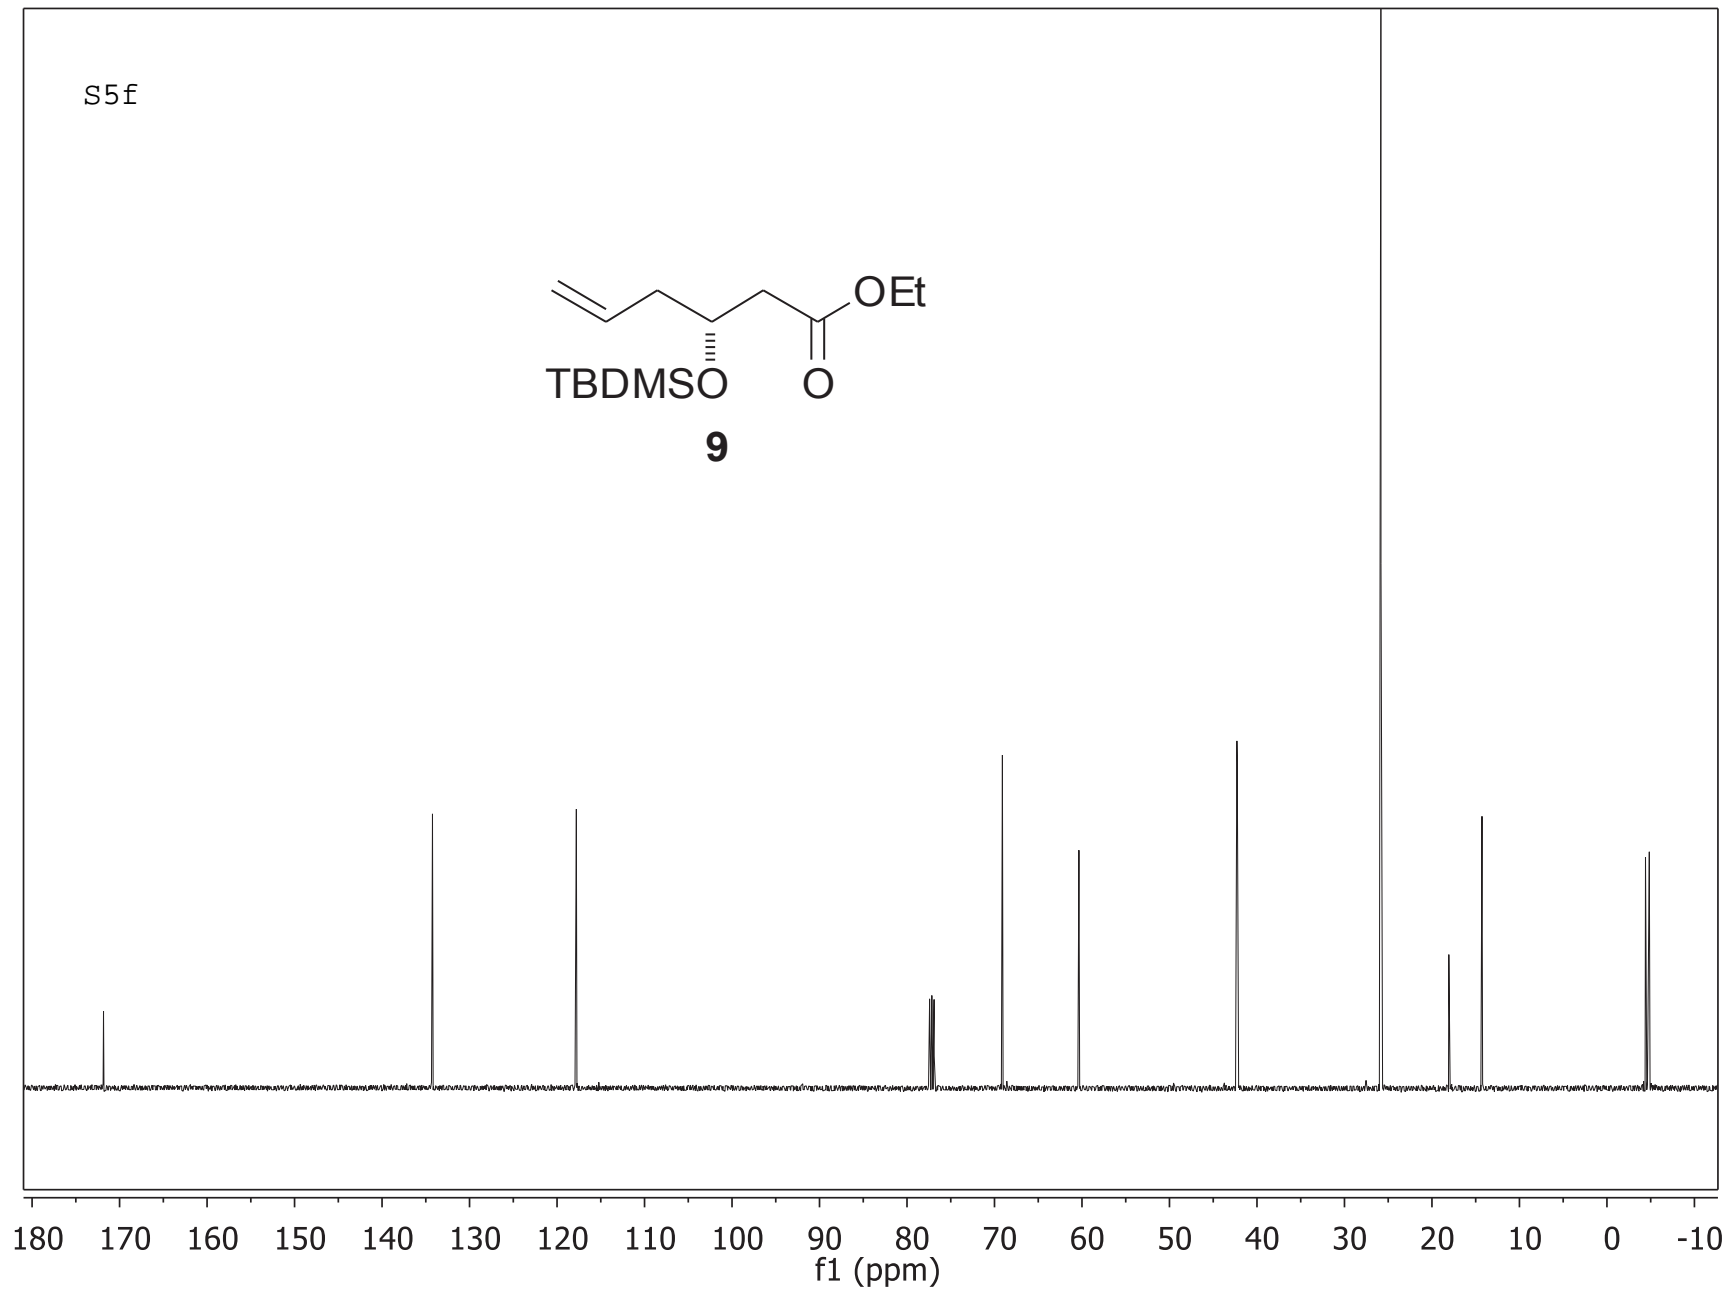

!

S5g

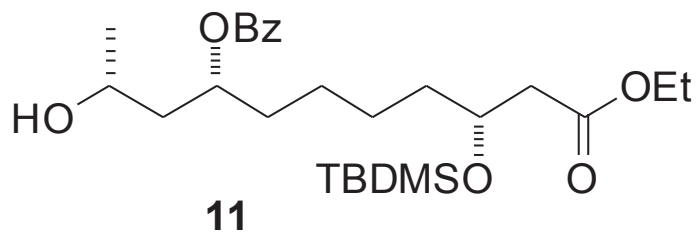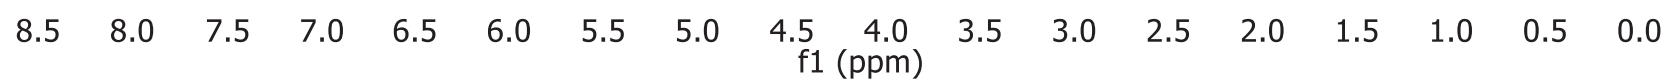

!

S5h

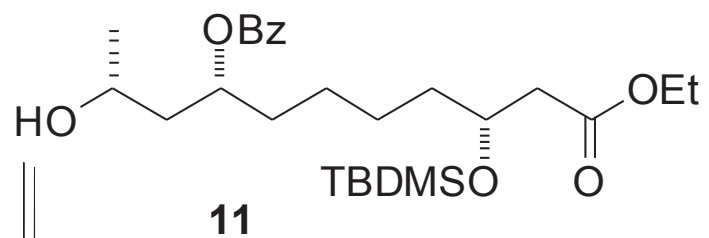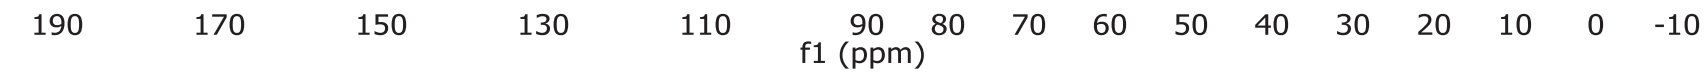



S5i

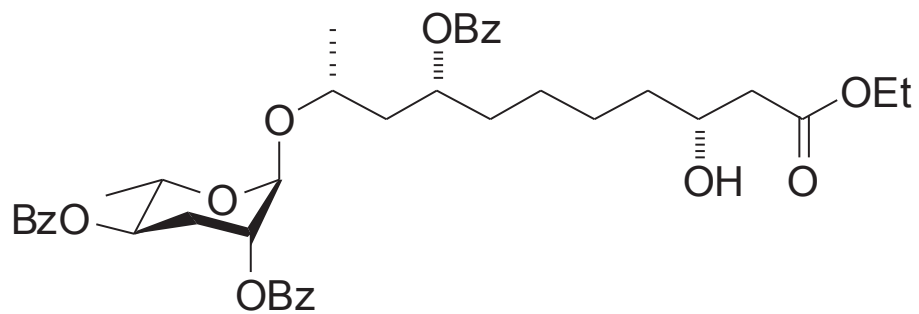

13

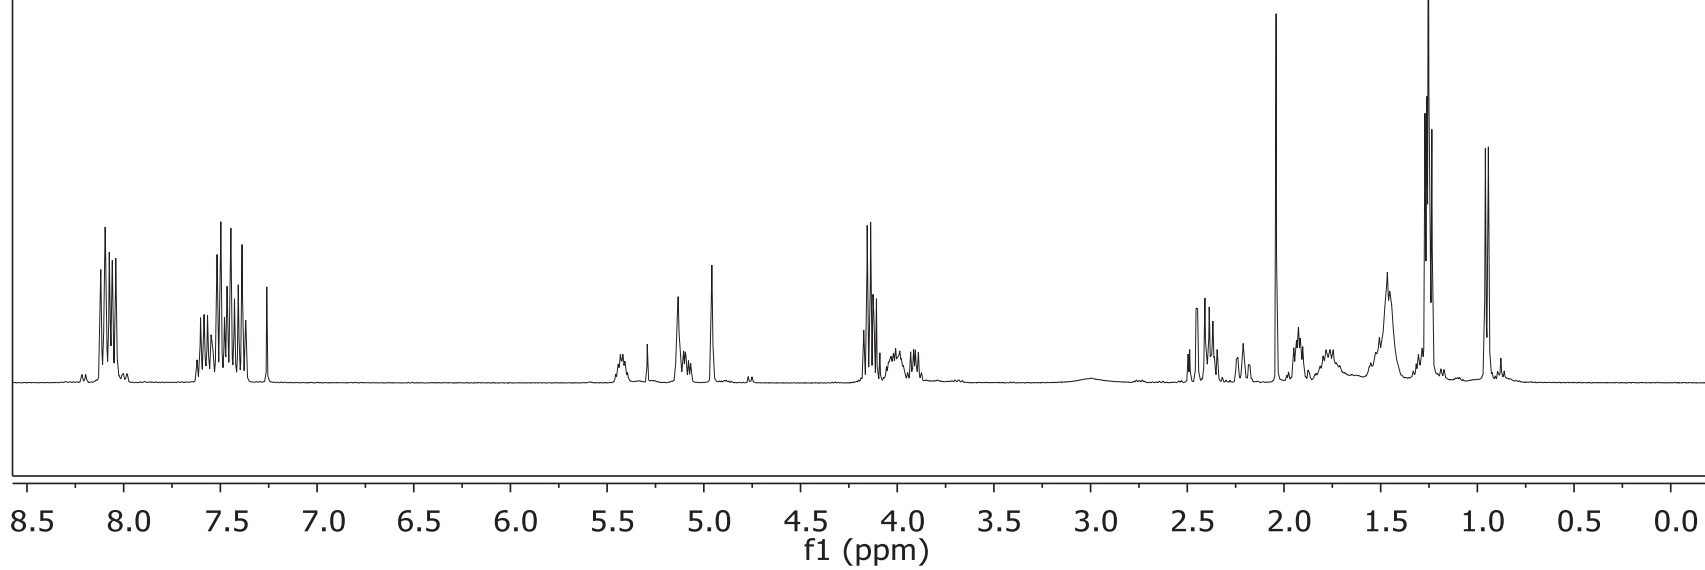

S5 j

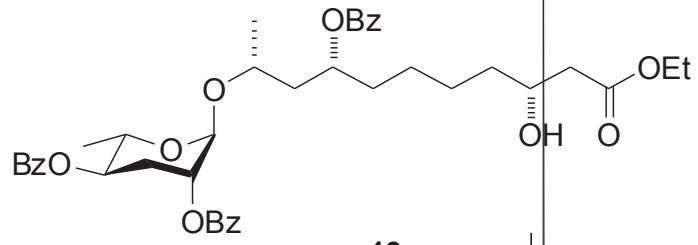

13

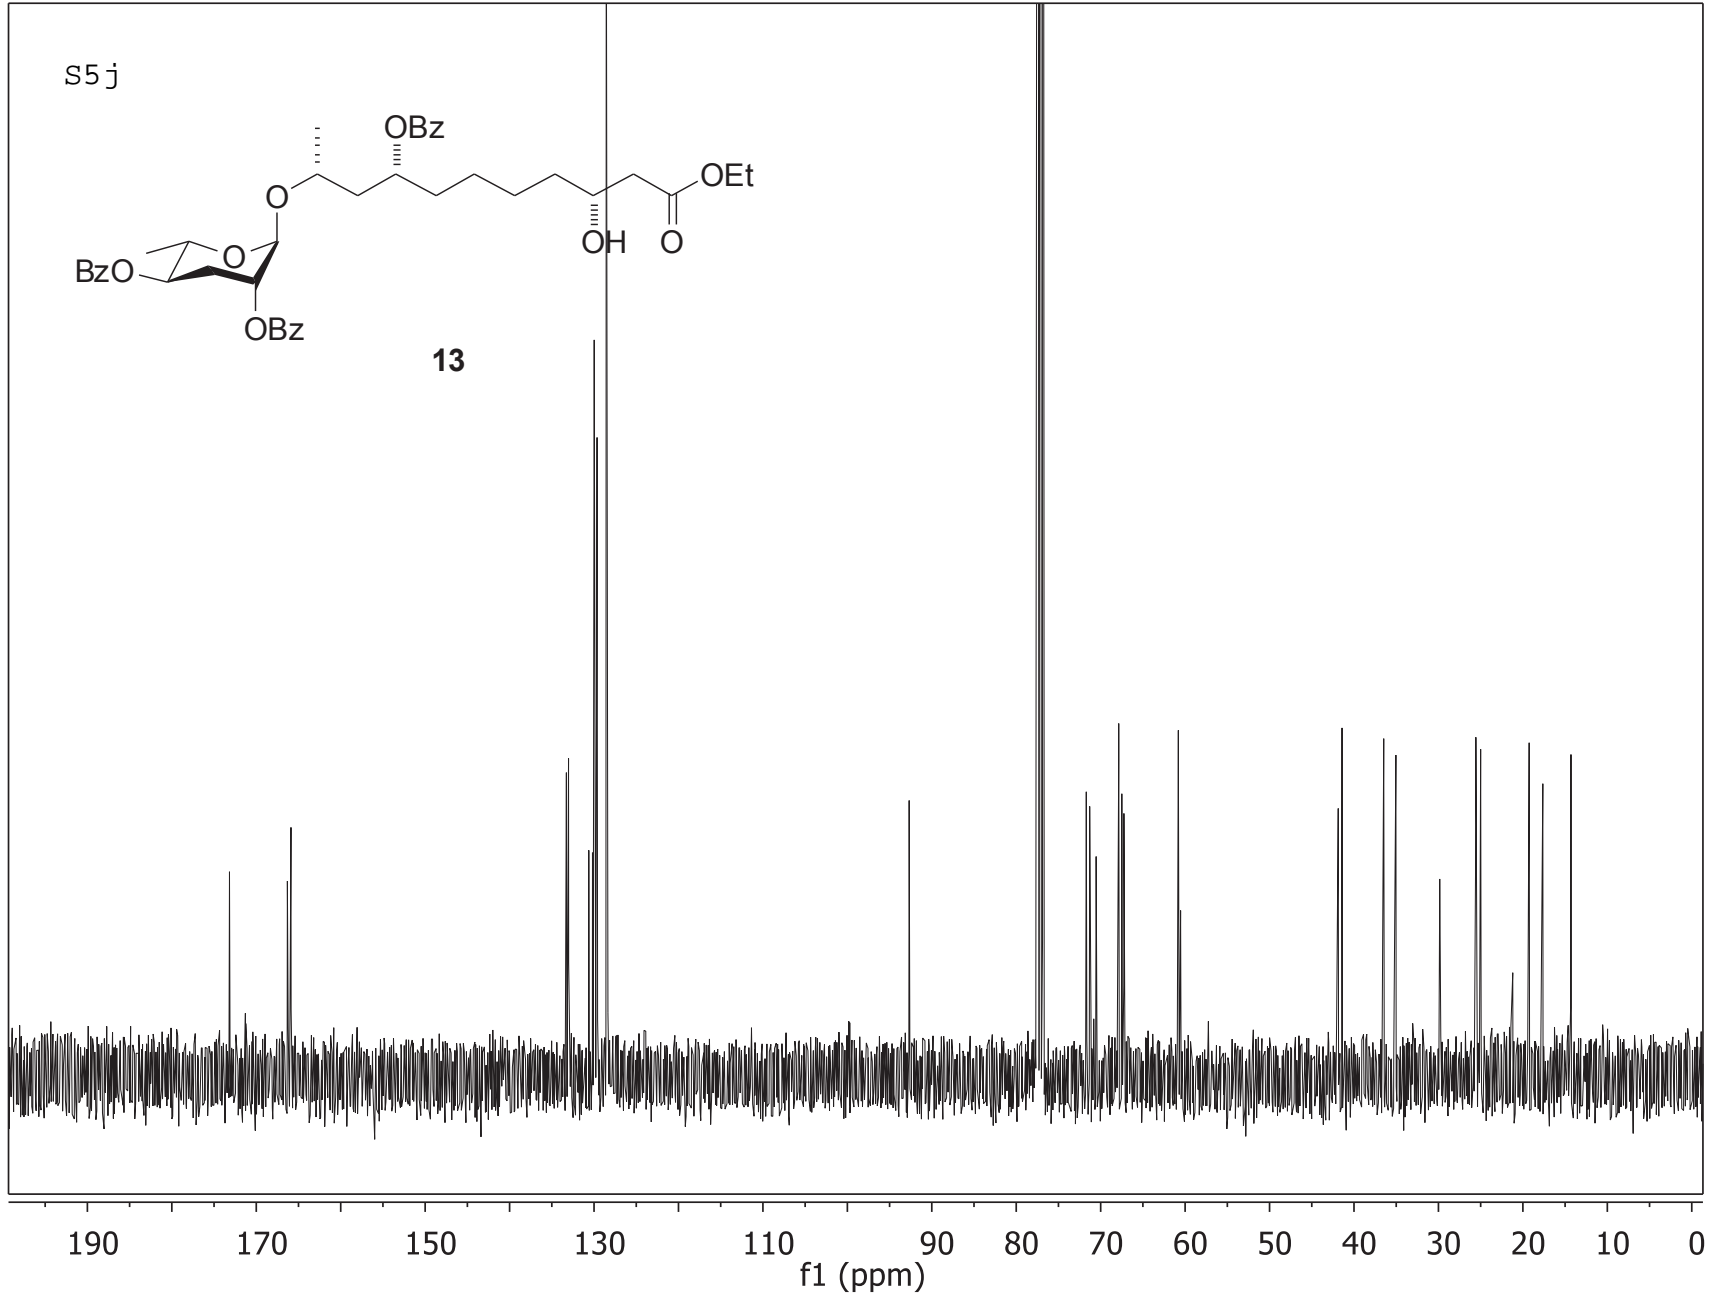

S5k

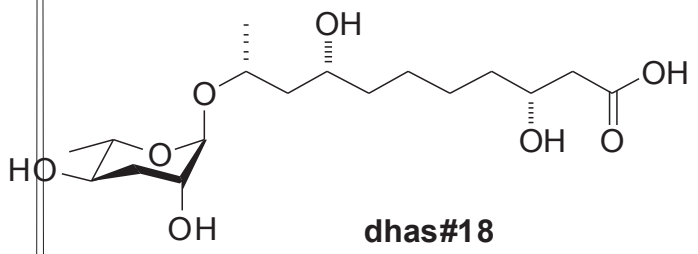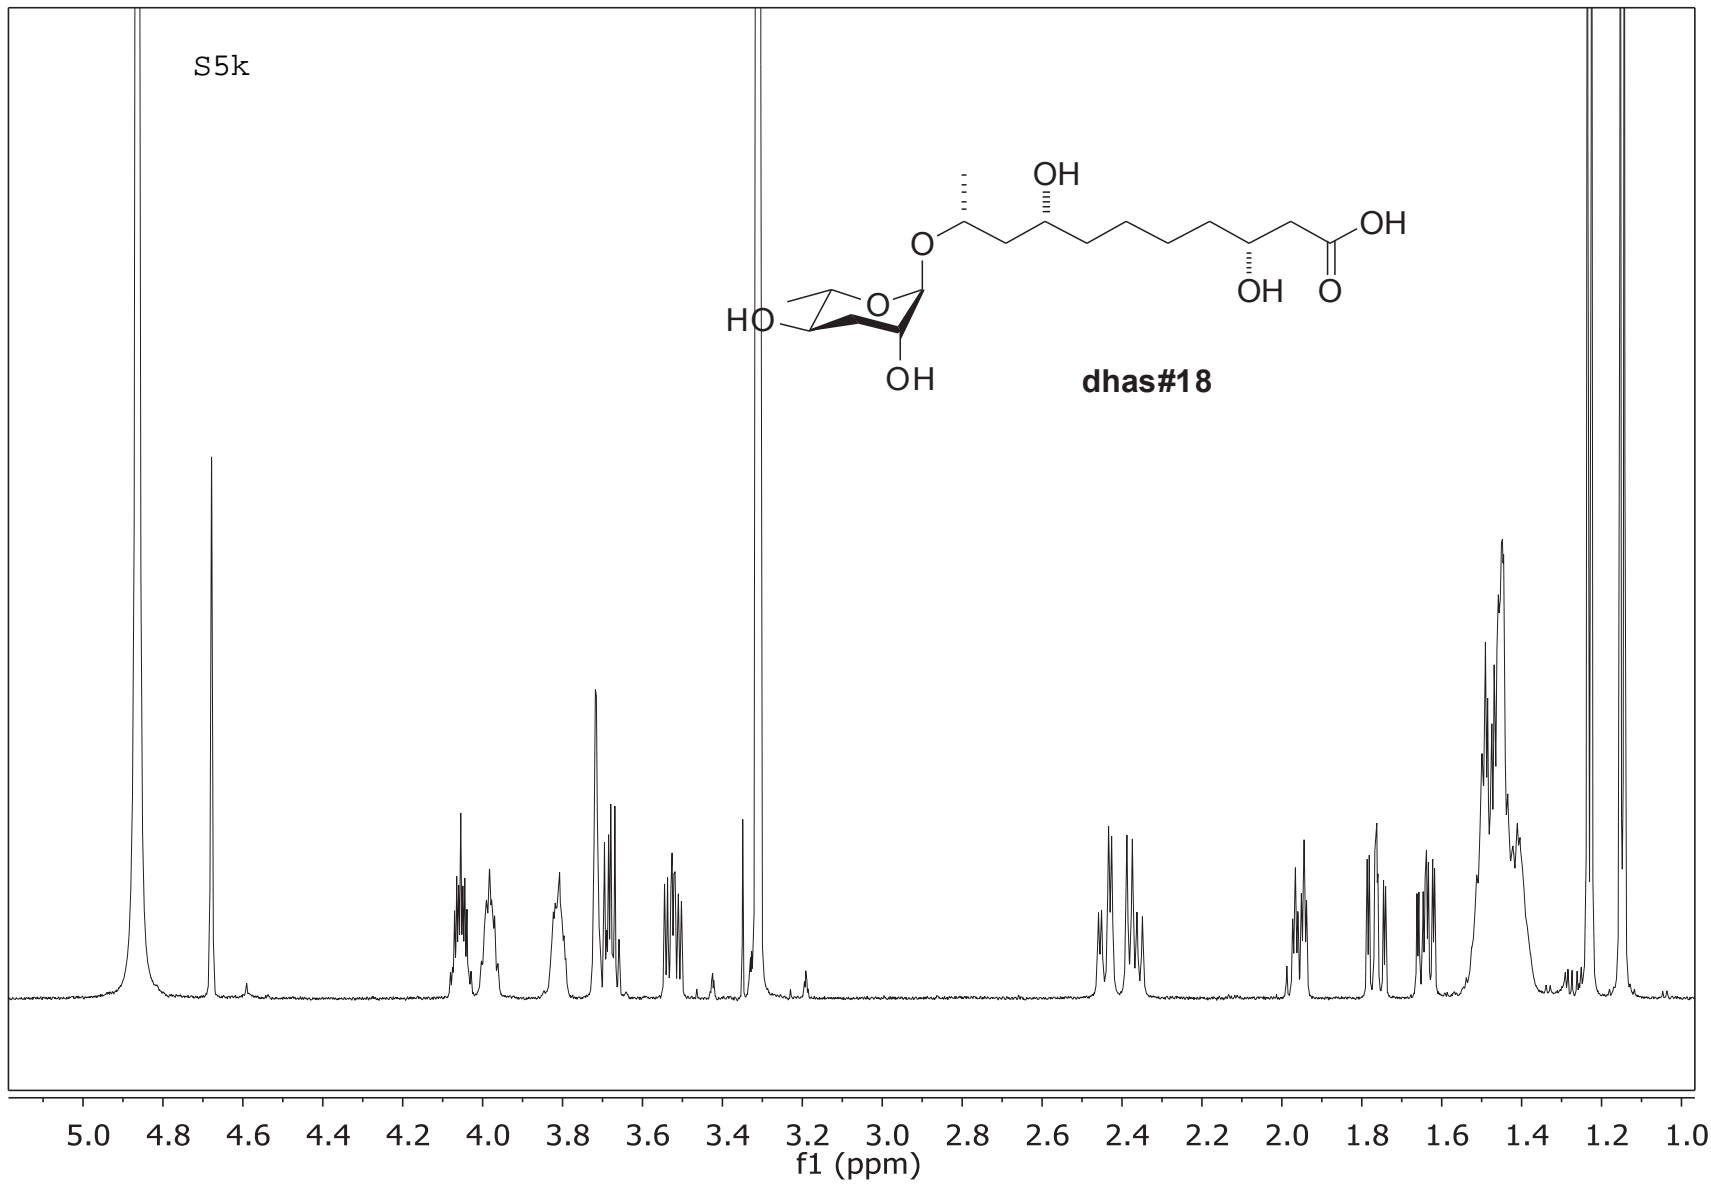

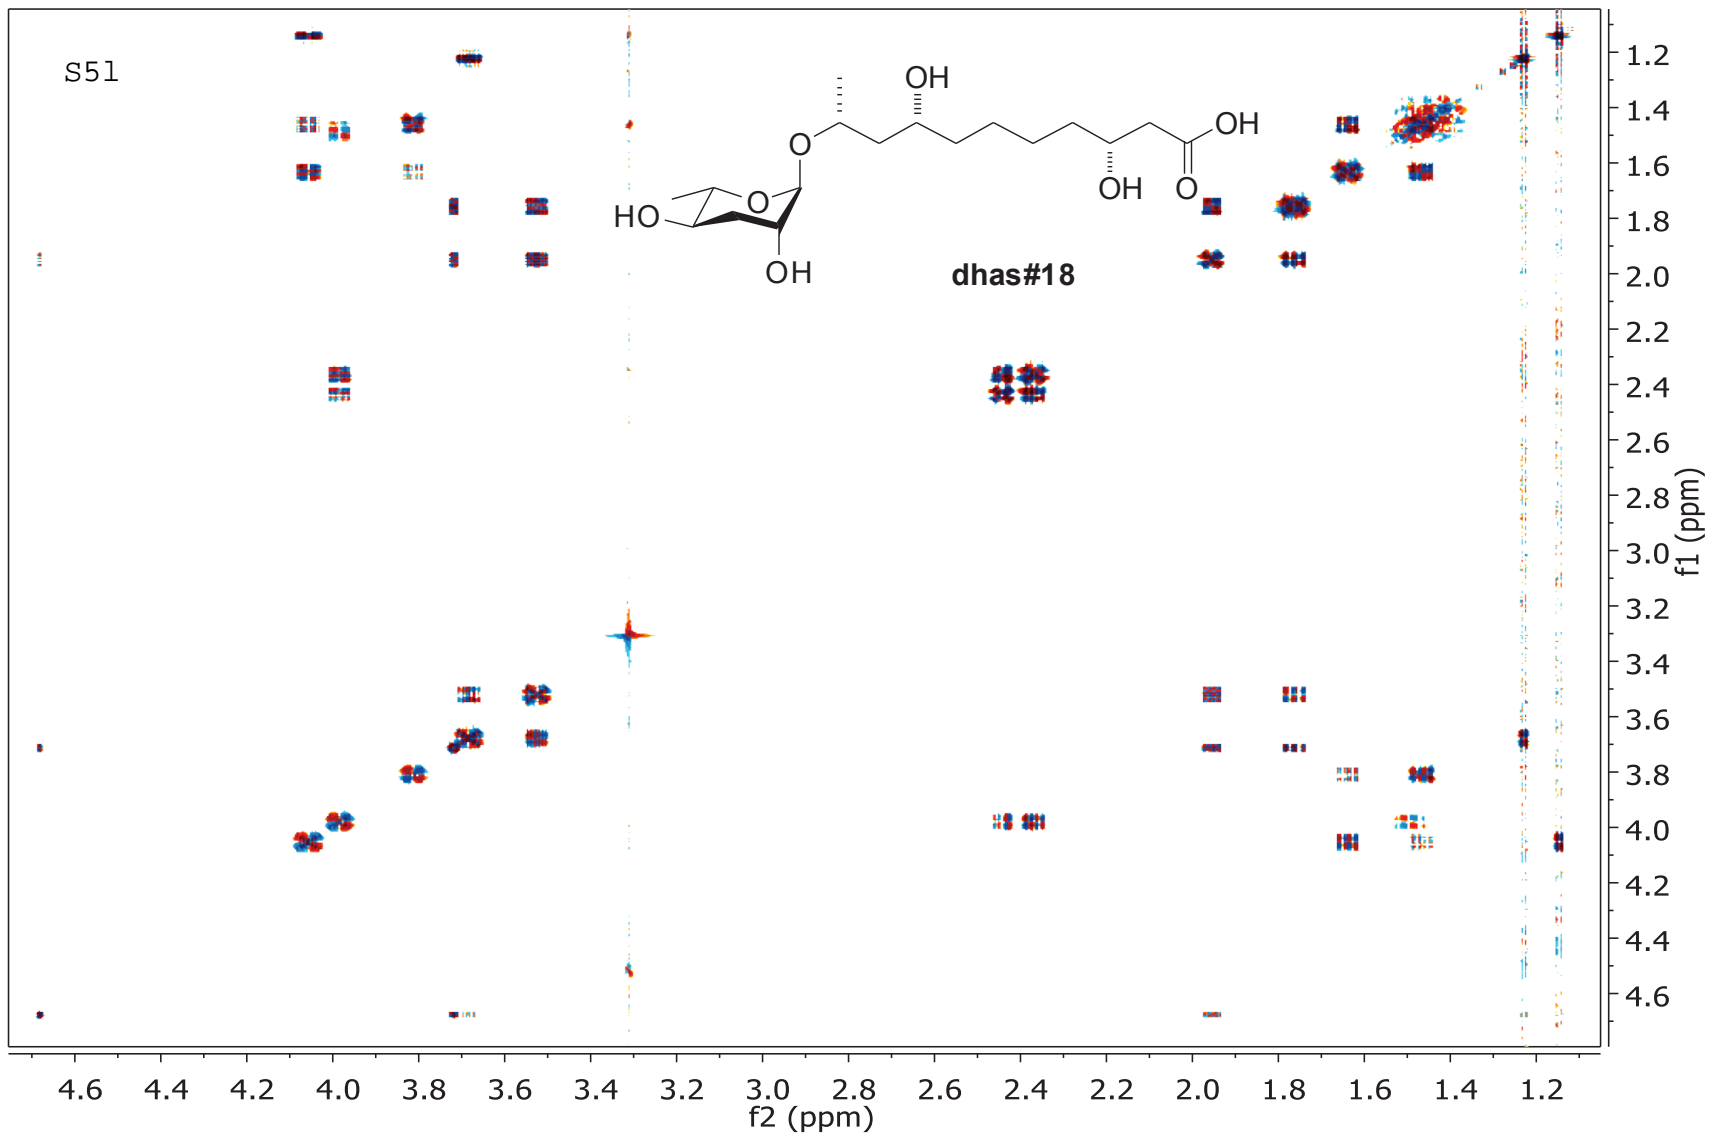

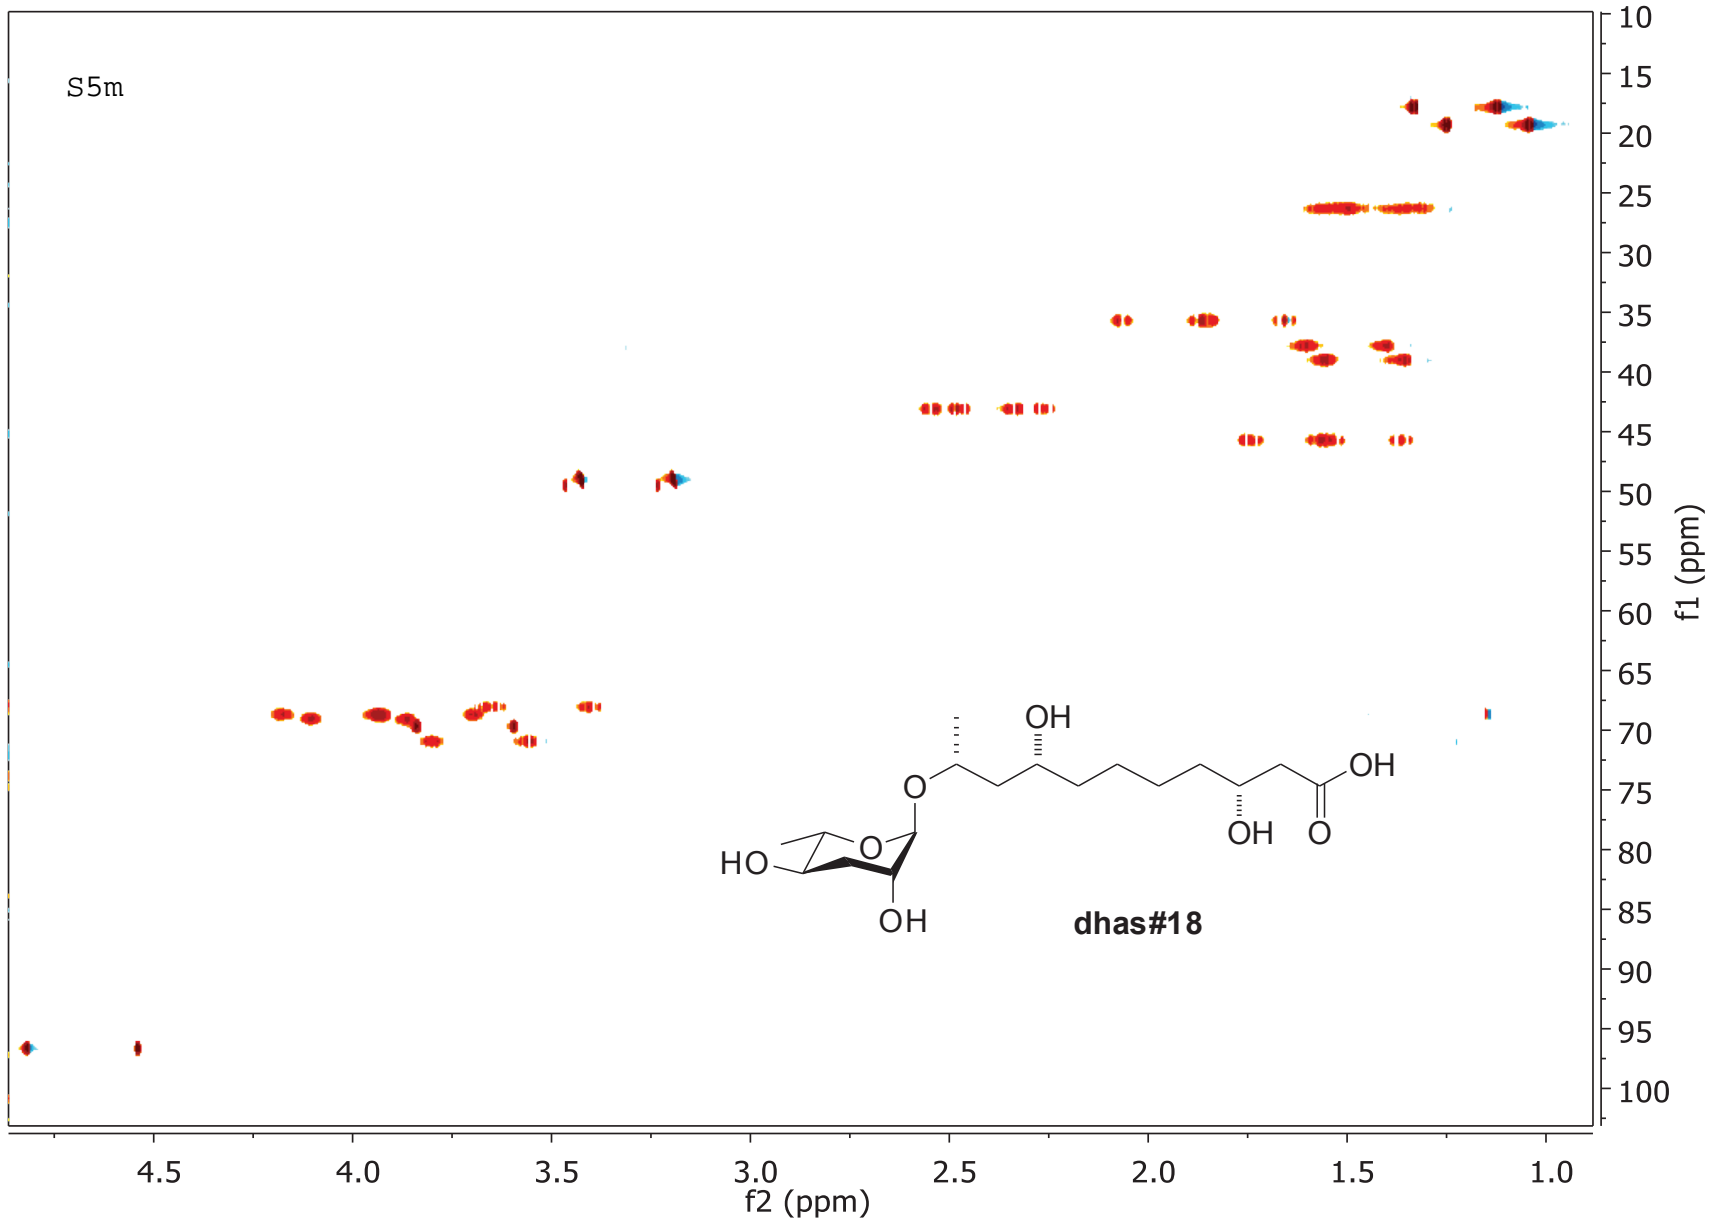

!

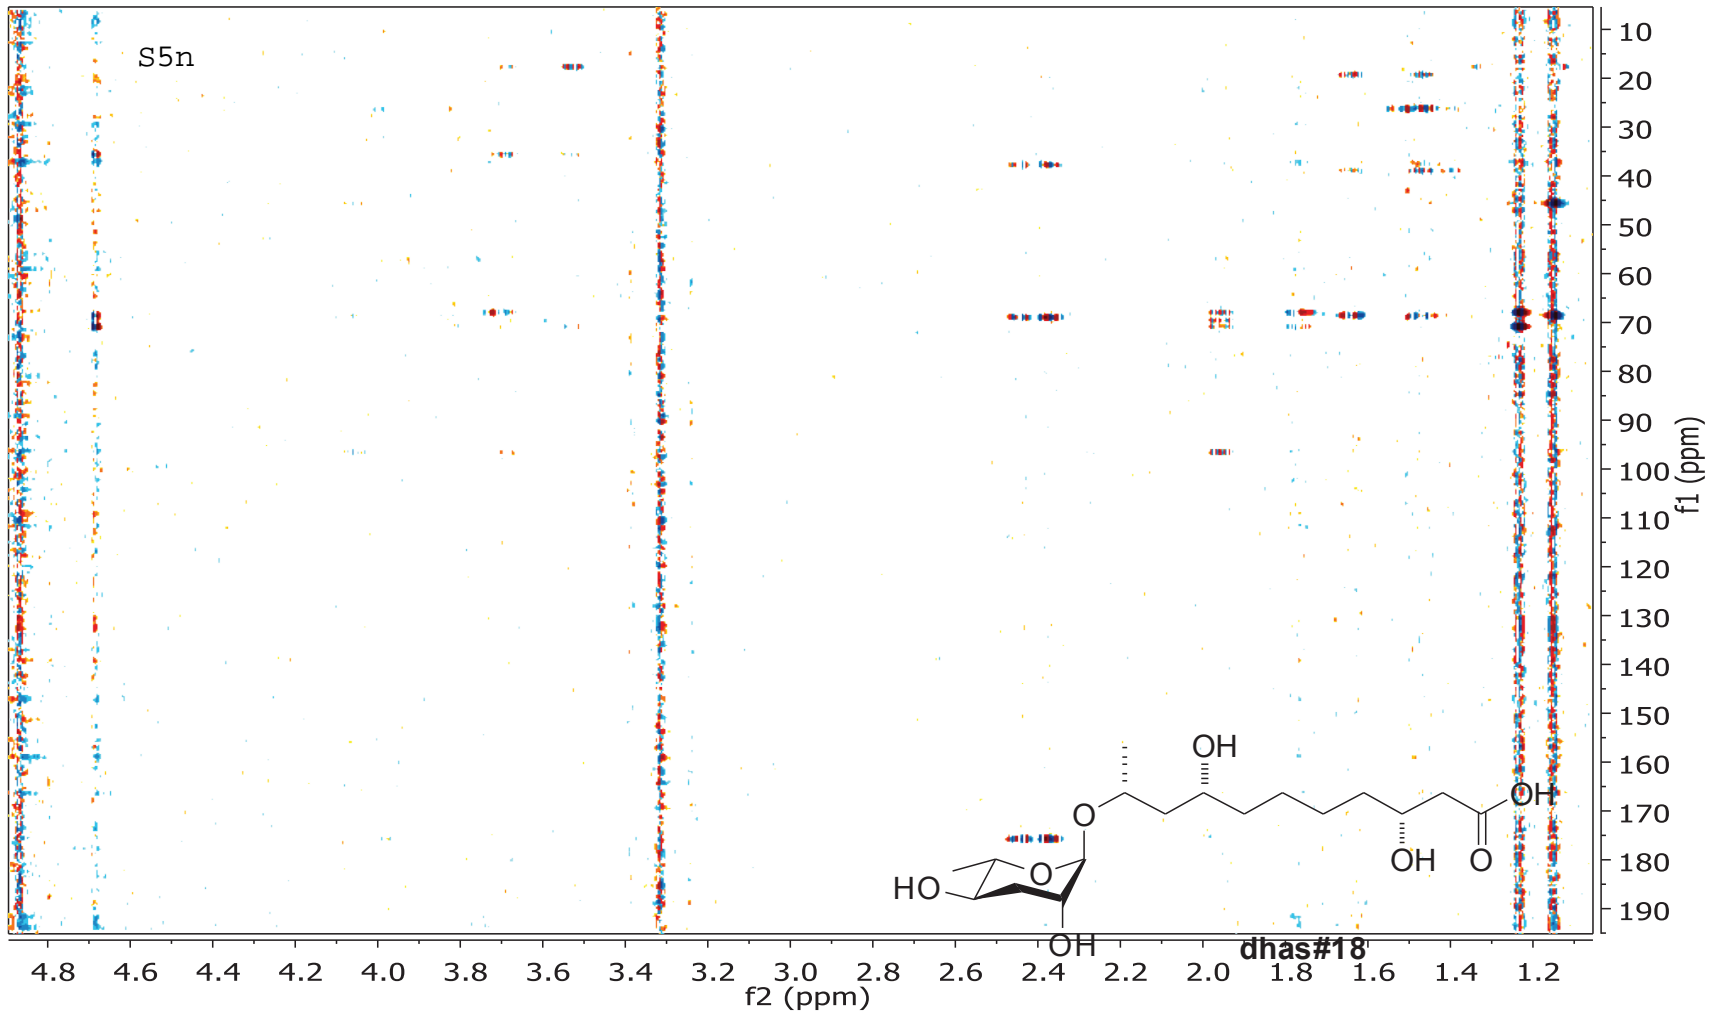

Supplement: 1218302109_sfig05.pdf [file 1218302109_sfig05.pdf]
